# Supplementary material for: Endohedral anionic nine-atom Zintl clusters of the elements tin and lead with lithium counterions
Source: Royal Society of Chemistry journal article supplement (doi:10.1039/d5sc08011h), 2026-01-01
Supplement: d5sc08011h1.pdf [file d5sc08011h1.pdf]

## Supporting Information

### Endohedral Anionic Nine-Atom Zintl Clusters of the Elements Tin and Lead with Lithium Counterions

C.E. Fajman,<sup>a</sup> D. M. Dankert,<sup>a</sup> P. Coburger,<sup>a</sup> W. Klein,<sup>b</sup> and T. F. Fässler<sup>a\*</sup>

<sup>a</sup> Technical University of Munich, TUM School of Natural Sciences, Chemistry Department, Chair of Inorganic Chemistry with Focus on New Materials, Lichtenbergstraße 4, 85748 Garching, Germany

<sup>b</sup> Technical University of Munich, Catalysis Research Centre, Ernst-Otto-Fischer-Straße 1, 85748 Garching, Germany

#### Content

|                                                       |    |
|-------------------------------------------------------|----|
| 1. Experimental details .....                         | 2  |
| 2. NMR .....                                          | 7  |
| 3. EDX .....                                          | 10 |
| 4. Raman .....                                        | 15 |
| 5. PXRD.....                                          | 16 |
| 5. Volume change.....                                 | 17 |
| 6. Crystallographic details.....                      | 19 |
| 7. Cartesian coordinates of optimized structures..... | 31 |
| 7. References .....                                   | 32 |

## 1. Experimental details

### General

All manipulations were performed under the exclusion of moisture and oxygen by utilizing standard Schlenk and glove box techniques under Argon atmosphere. Ethylenediamine was distilled over  $\text{CaH}_2$ , all other solvents were dried by a MBraun Grubbs solvent purification system and subsequently degassed by freeze-pump-thaw. Glassware was dried at 650 °C under dynamic vacuum prior to usage. Anhydrous LiCl was dried at 500 °C by applying dynamic vacuum for 8 h. The solid-state precursors  $\text{K}_4\text{Tt}_9$  ( $\text{Tt} = \text{Sn}, \text{Pb}$ ) were prepared by a slightly modified literature procedure.<sup>[1, 2]</sup> The elements were heated with a rate of 2 °C/h in stainless-steel autoclaves and fused at 550 °C and 650 °C for 48 h, respectively. Followed by a slow cooling at a rate of -1 °C/h. All other chemicals were used without further purification.  $\text{Ni}(\text{COD})_2$ ,  $\text{TM}(\text{PPh}_3)_4$  were obtained by Merck.

### Single crystal structure determination

The moisture- and air-sensitive crystals were transferred into perfluoroalkyl ether oil in a glove box. Suitable single crystals were isolated under a microscope and fixed on glass capillaries. The data collections were performed using a STOE StadiVari diffractometer (Mo  $K_\alpha$  radiation) equipped with a DECTRIS PILATUS 300K detector, with the crystal positioned in a 150 K cold  $\text{N}_2$  gas stream. Direct methods (SHELXS-97)<sup>[3]</sup> were used to solve the structures, and the structure refinements were performed by full-matrix least-squares calculations against  $F^2$  (SHELXL-2018).<sup>[4]</sup> Anisotropic displacement parameters were set for all non-hydrogen atoms except for Fe in compound **1**, because during the anisotropic refinement of this Fe position the displacement parameters become negative. The positions of hydrogen atoms were modelled using a riding model.

### NMR spectroscopy

Compounds **4**, **5** and **7** were dissolved in *en* and the NMR tube equipped with a lock capillary filled with  $\text{C}_6\text{D}_6$ .  $^7\text{Li}$  NMR,  $^{119}\text{Sn}$  NMR and  $^{207}\text{Pb}$  NMR spectra were acquired on a Bruker Avance Ultrashield 400 MHz or a Bruker Avance 300 spectrometer.  $^7\text{Li}$  NMR,  $^{119}\text{Sn}$  NMR and  $^{207}\text{Pb}$  spectra were calibrated by an external standard (9.7 M LiCl in  $\text{D}_2\text{O}$ ,  $\text{Me}_4\text{Sn}$  90% in  $\text{C}_6\text{D}_6$ , and  $\text{Pb}(\text{NO}_3)_2$  in  $\text{D}_2\text{O}$ ).

### Energy Dispersive X-Ray (EDX) Analysis

For the data collection a Hitachi TM-1000 tabletop scanning electron microscope equipped with an energy dispersive X-ray analyzer was used. The respective samples were stuck on a carbon sticky tape under Ar atmosphere, and the samples were transferred to the EDX device in a closed glass. Immediately before insertion, the

container was opened and the probe was transferred as quickly as possible to minimize air exposure. Prior to the measurement the EDX Detector was calibrated with a Cu-Standard (piece of copper tape)."

### **EPR spectroscopy**

EPR measurements were carried out using a JEOL JES-FA 200 spectrometer at X-band frequency (approximately 9.05 GHz, sweep width 50 mT, modulation frequency 100 kHz, modulation amplitude 0.4 mT, microwave power 5.0 mW, measurement temperature 120 K). The  $g$  values were determined using  $\text{Mn}^{2+}$  (nuclear spin  $I = 5/2$ ) embedded in MgO as a standard (fourth line  $g = 1.981$ ). The temperature was monitored with a JEOL DVT4 temperature controller. The measurement was performed on solid crystalline sample. The samples were cooled to  $\text{N}_2(\text{l})$  temperature prior to the measurements. Simulation of EPR spectra occurred using the simulation program Easyspin.<sup>[5]</sup>

### **Raman**

Raman spectroscopy was performed using a Renishaw inVia Raman microscope equipped with a CCD detector and 520 nm lasers with a maximum power of 0.01 mW. The software WiRe 4.2 (build 5037, Renishaw 2002) was used for operating the device. All samples were measured on single crystals in glass capillaries (outer diameter 0.3 mm, wall thickness 0.01 mm, MARK capillaries, Müller & Müller OHG), which were sealed using capillary wax (Hampton Research).

### **Volume calculations**

The volume of the nine-atomic clusters were calculated using the program polynator.<sup>[6]</sup> The central  $TM$  atom has been set as the central atom with a radius of 3 Å, while the framework atoms of the cluster have been assigned as the ligand atoms (Sn or Pb). The additional data which are not reported in the present work have been obtained from CCDC. References see Table S9.

### **Computational Details**

All calculations were carried out with the ORCA program package.<sup>[7, 8]</sup> To balance the high negative charge of the investigated anions, the CPCM model was used for all calculations setting the dielectric constant of the embedding medium to infinity. Density fitting techniques, also called resolution-of-identity approximation (RI)<sup>[9]</sup>, were used for geometry optimisations at the BP86-D3BJ/def2-SVP level and the RIJCOSX<sup>[10]</sup> approximation was used for calculating the spin density at the TPSS0/cc-pVTZ-DK<sup>[11-13]</sup> level.

## Powder X-ray Diffraction

For powder X-ray diffraction (PXRD) analysis the samples were finely ground in an agate mortar, diluted with diamond powder and sealed in glass capillaries (outer diameter 0.3 mm, wall thickness 0.01 mm, MARK capillaries, Müller & Müller OHG) with capillary wax (Hampton Research) in an argon-filled glove box. PXRD were performed at room temperature by using a Stoe STADI P powder diffractometer equipped with a linear position-sensitive detector (Mythen 1K) using Cu  $K_{\alpha 1}$  ( $\lambda = 1.54060 \text{ \AA}$ ) and curved Ge (111) monochromators. The samples were measured in Debye-Scherrer geometry ( $2\theta_{\text{max}} = 22.5^\circ$ ). Data analysis was carried out by using Stoe WinXPOW software package.<sup>[14]</sup>

## Syntheses

### [Li(en)<sub>2</sub>]<sub>4</sub>[Fe<sub>0.059(3)</sub>@Sn<sub>9</sub>] (1)

In a first step the *Zintl* phase K<sub>4</sub>Sn<sub>9</sub> (91.9 mg, 75  $\mu\text{mol}$ , 1 equiv.) and IPrFeDVTMS (47.3 mg, 75  $\mu\text{mol}$ , 1 equiv.) are added to a Schlenk tube and 2 mL en are added. The mixture is left to stir for 1 h. Subsequently, the solution is added to a flask loaded with LiCl (12.7 mg, 300  $\mu\text{mol}$ , 4 equiv.) and the reaction mixture stirred for 3 h at r.t. Afterwards the solution is filtered and the deeply red colored filtrate is layered with 2 mL of toluene. After 3 days red plates have grown on the wall of the Schlenk tube.

**EPR** silent. **Raman** 156  $\text{cm}^{-1}$ , 170  $\text{cm}^{-1}$ . **EDX**: Fe 2.2% (calc. 0.3%), Sn 97.8% (calc. 99.7%).

### [K[18]crown-6]<sub>2</sub>K<sub>2</sub>[Fe<sub>0.055(4)</sub>@Sn<sub>9</sub>] · 1.5 en (2)

The *Zintl* phase K<sub>4</sub>Sn<sub>9</sub> (91.9 mg, 75  $\mu\text{mol}$ , 1 equiv.), IPrFeDVTMS (47.3 mg, 75  $\mu\text{mol}$ , 1 equiv.) and 18-crown-6 (39.6 mg, 150  $\mu\text{mol}$ , 1 equiv.) are weighted into a Schlenk tube and 2 mL en are added. The mixture is left to stir for 3 h. Subsequently, the solution is filtered and the deeply red colored filtrate is layered with 2 mL of toluene. After 3 days red needles have grown on the wall of the Schlenk tube.

**EPR** silent. **Raman** 154  $\text{cm}^{-1}$ , 168  $\text{cm}^{-1}$ . **EDX**: K 12.7% (calc. 12.7%), Fe 2.2% (calc. 0.3%), Sn 85.0% (calc. 87.0%).

### [Li(en)<sub>2</sub>]<sub>4</sub>[Co<sub>0.827(5)</sub>@Sn<sub>9</sub>] (3)

In a first step the *Zintl* phase K<sub>4</sub>Sn<sub>9</sub> (91.9 mg, 75  $\mu\text{mol}$ , 1 equiv.) and IPrCoDVTMS (47.5 mg, 75  $\mu\text{mol}$ , 1 equiv.) are added to a Schlenk tube and 2 mL en are added. The mixture is left to stir for 1 h. Subsequently, the solution is added to a flask loaded with LiCl (12.7 mg, 300  $\mu\text{mol}$ , 4 equiv.) and the reaction mixture stirred for 3 h at r.t. Afterwards the solution is filtered and the deeply red colored filtrate is layered with 2

ml of toluene. After 7 days thin and red plates have grown on the wall of the Schlenk tube.

**EPR**  $g_{\text{iso}} = 2.0581$ . **Raman**  $156\text{ cm}^{-1}$ ,  $168\text{ cm}^{-1}$ . **EDX**: Co 4.1% (calc. 4.4%), Sn 95.9% (calc. 95.6%).

#### **[Li(en)<sub>2</sub>]<sub>4</sub>[Ni@Sn<sub>9</sub>] (4)**

In a first step the *Zintl* phase K<sub>4</sub>Sn<sub>9</sub> (91.9 mg, 75  $\mu\text{mol}$ , 1 equiv.) and Ni(COD)<sub>2</sub> (20.6 mg, 75  $\mu\text{mol}$ , 1 equiv.) are added to a Schlenk tube and 2 mL en are added. The mixture is left to stir for 1 h. Subsequently, the solution is added to a flask loaded with LiCl (12.7 mg, 300  $\mu\text{mol}$ , 4 equiv.) and the reaction mixture stirred for 3 h at r.t. Afterwards the solution is filtered and the deeply red colored filtrate is layered with 2 ml of toluene. After 7 days red plates have grown on the wall of the Schlenk tube.

**<sup>7</sup>Li NMR** (300 MHz, 298 K, en/C<sub>6</sub>D<sub>6</sub>):  $\delta$  [ppm] = 1.54 ppm. **<sup>119</sup>Sn NMR** (300 MHz, 298 K, en/C<sub>6</sub>D<sub>6</sub>):  $\delta$  [ppm] = 1232 ppm (< 158 Hz). **Raman**  $149\text{ cm}^{-1}$ ,  $168\text{ cm}^{-1}$ . **EDX**: Ni 5.1% (calc. 5.2%), Sn 94.9% (calc. 94.8%).

#### **[Li(en)<sub>2</sub>]<sub>4</sub>[Pd<sub>0.824(4)</sub>@Sn<sub>9</sub>] (5)**

In a first step the *Zintl* phase K<sub>4</sub>Sn<sub>9</sub> (91.9 mg, 75  $\mu\text{mol}$ , 1 equiv.) and Pd(PPh<sub>3</sub>)<sub>4</sub> (86.7 mg, 75  $\mu\text{mol}$ , 1 equiv.) are added to a Schlenk tube and 2 mL en are added. The mixture is left to stir for 1 h. Subsequently, the solution is added to a flask loaded with LiCl (12.7 mg, 300  $\mu\text{mol}$ , 4 equiv.) and the reaction mixture stirred for 3 h at r.t. Afterwards the solution is filtered and the deeply red colored filtrate is layered with 2 ml of toluene. After 3 days red plates have grown on the wall of the Schlenk tube.

**<sup>7</sup>Li NMR** (300 MHz, 298 K, en/C<sub>6</sub>D<sub>6</sub>):  $\delta$  [ppm] = 1.66 ppm. **<sup>119</sup>Sn NMR** (300 MHz, 298 K, en/C<sub>6</sub>D<sub>6</sub>):  $\delta$  [ppm] = 763 ppm (74 < Hz). **Raman**  $154\text{ cm}^{-1}$ ,  $170\text{ cm}^{-1}$ . **EDX**: Pd 5.9% (calc. 7.6%), Sn 94.1% (calc. 92.4%).

#### **[Li(en)<sub>2</sub>]<sub>4</sub>[Pd<sub>0.460(5)</sub>@Pb<sub>9</sub>] (6)**

In a first step the *Zintl* phase K<sub>4</sub>Pb<sub>9</sub> (91.9 mg, 75  $\mu\text{mol}$ , 1 equiv.) and Pd(PPh<sub>3</sub>)<sub>4</sub> (86.7 mg, 75  $\mu\text{mol}$ , 1 equiv.) are added to a Schlenk tube and 2 mL en are added. The mixture is left to stir for 1 h. Subsequently, the solution is added to a flask loaded with LiCl (12.7 mg, 300  $\mu\text{mol}$ , 4 equiv.) and the reaction mixture stirred for 3 h at r.t. Afterwards the solution is filtered and the deeply red colored filtrate is layered with 2 ml of toluene. After 3 days red plates have grown on the wall of the Schlenk tube.

**Raman**: no bands were observed. **EDX**: Pd 4.3% (calc. 2.6%), Sn 95.7% (calc. 97.4%).

### **[Li(en)<sub>2</sub>]<sub>4</sub>[Pt<sub>0.426(4)</sub>@Pb<sub>9</sub>] (7)**

In a first step the *Zintl* phase K<sub>4</sub>Pb<sub>9</sub> (91.9 mg, 75 μmol, 1 equiv.) and Pt(PPh<sub>3</sub>)<sub>4</sub> (93.3 mg, 75 μmol, 1 equiv.) are added to a Schlenk tube and 2 mL en are added. The mixture is left to stir for 1 h. Subsequently, the solution is added to a flask loaded with LiCl (12.7 mg, 300 μmol, 4 equiv.) and the reaction mixture stirred for 3 h at r.t. Afterwards the solution is filtered and the deeply red colored filtrate is layered with 2 ml of toluene. After 14 days tiny red plates besides a metallic dust have grown on the wall of the Schlenk tube. Crystallization and reaction experiments have been done under the exclusion of light and at lower temperatures (6°C). However, only under the complete exclusion of light was it possible to obtain single crystals, therefore we conclude that the compound is light sensitive.

**<sup>7</sup>Li NMR** (300 MHz, 298 K, en/C<sub>6</sub>D<sub>6</sub>): δ [ppm] = 1.7. **<sup>209</sup>Pb NMR** (300 MHz, 298 K, en/C<sub>6</sub>D<sub>6</sub>): δ [ppm] = -3062 ppm (<sup>1</sup>J(<sup>195</sup>Pt-<sup>207</sup>Pb) = 3440 Hz). **Raman**: no bands were observed. **EDX**: Pt 7.6% (calc. 4.6%), Pb 92.4% (calc. 95.8%).

## 2. NMR

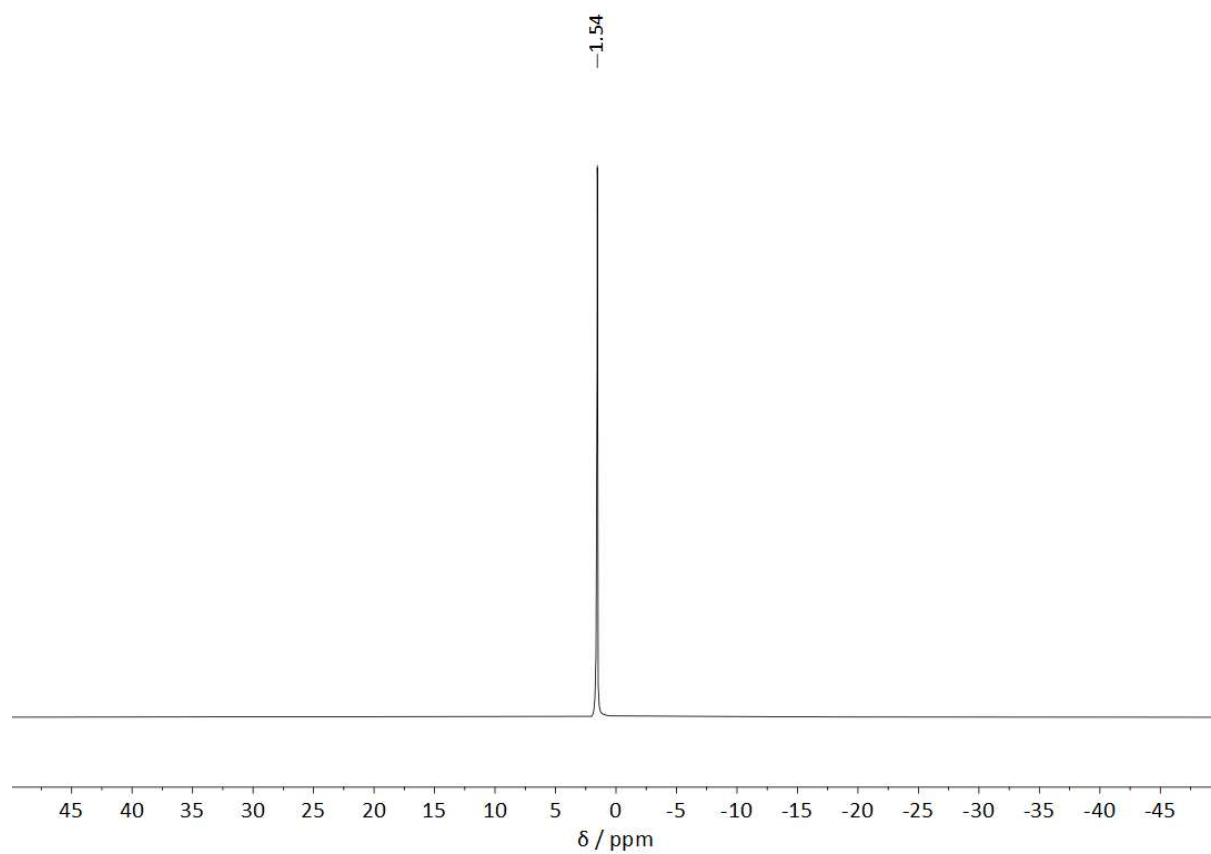

**Figure S1:**  ${}^7\text{Li}$  NMR spectrum of compound **4** recorded from *en* with a  $\text{C}_6\text{D}_6$  lock capillary.

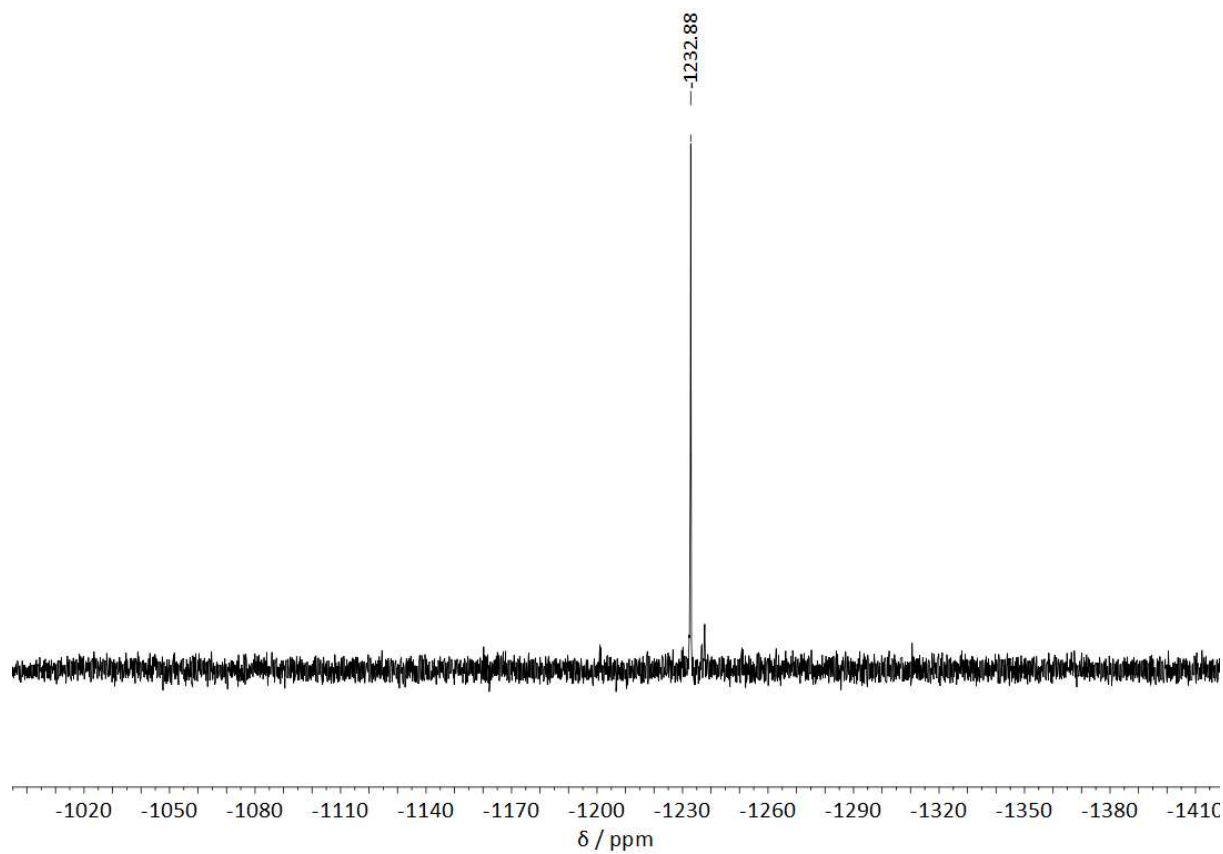

**Figure S2:**  ${}^{119}\text{Sn}$  NMR spectrum of compound **4** recorded from *en* with a  $\text{C}_6\text{D}_6$  lock capillary.

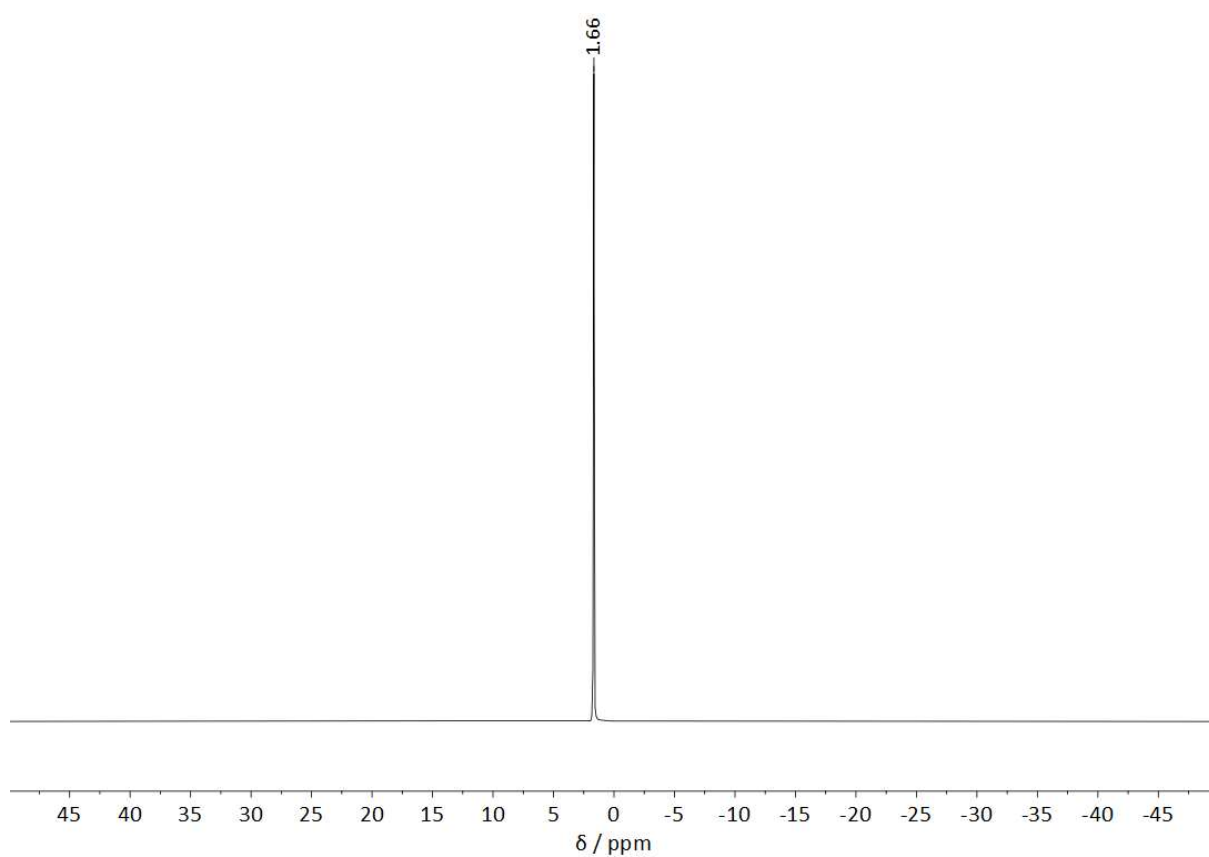

**Figure S3:**  ${}^7\text{Li}$  NMR spectrum of compound **5** recorded from *en* with a  $\text{C}_6\text{D}_6$  lock capillary.

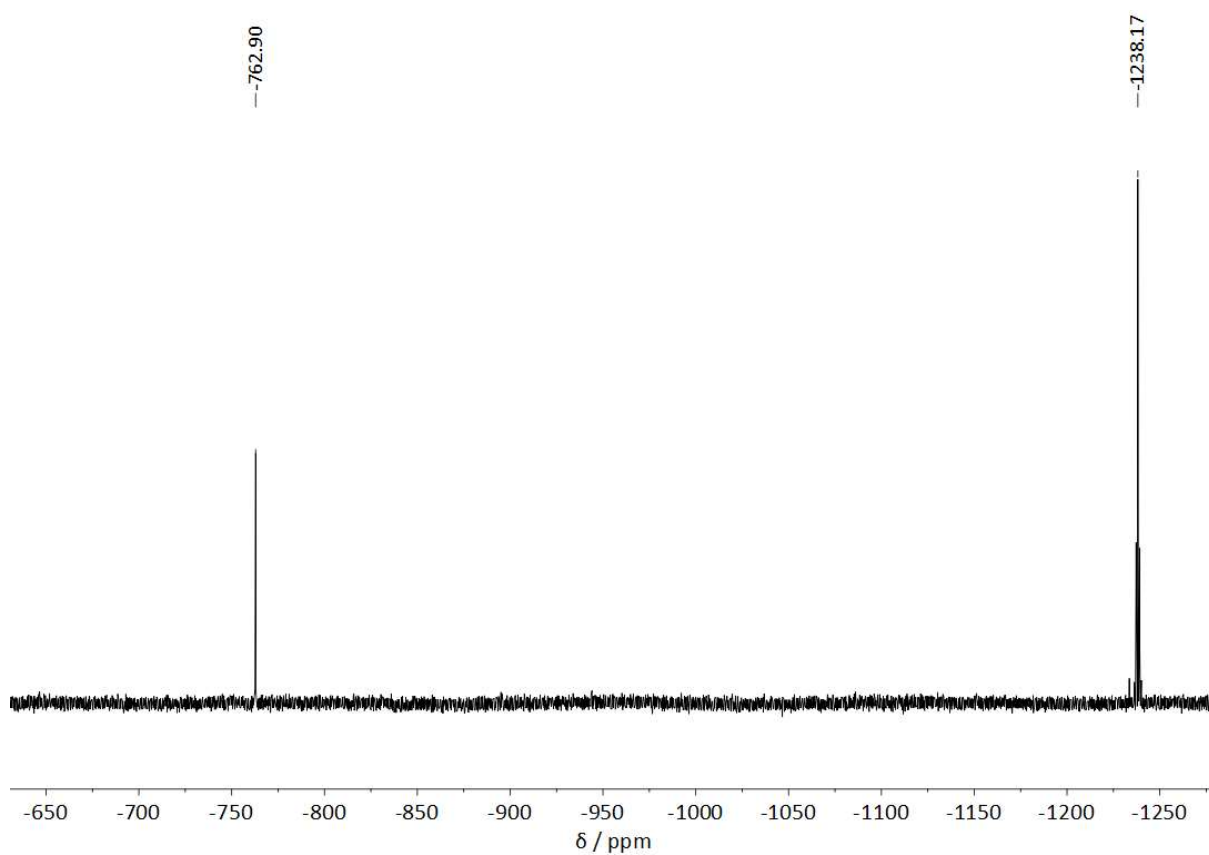

**Figure S4:**  ${}^{119}\text{Sn}$  NMR spectrum of compound **5** recorded from *en* with a  $\text{C}_6\text{D}_6$  lock capillary.



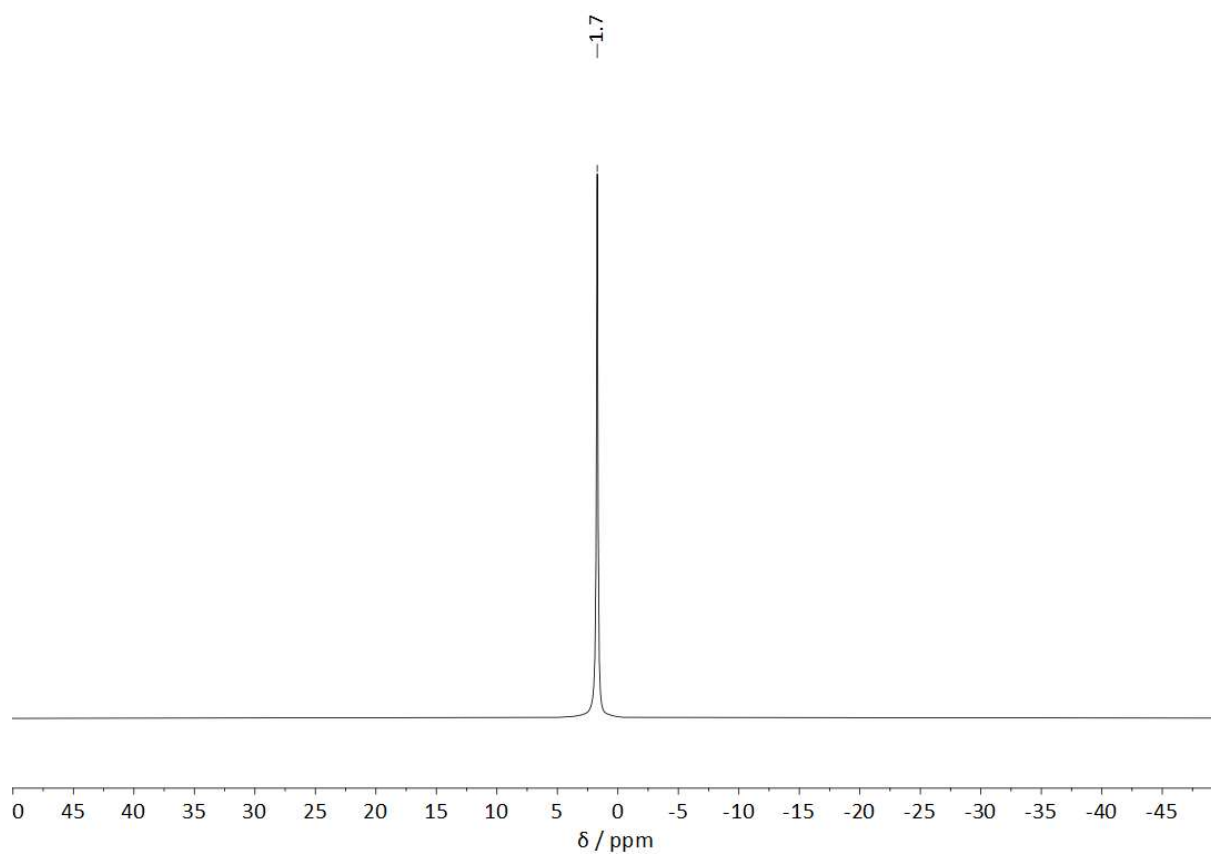

**Figure S5:**  ${}^7\text{Li}$  NMR spectrum of compound **7** recorded from *en* with a  $\text{C}_6\text{D}_6$  lock capillary.

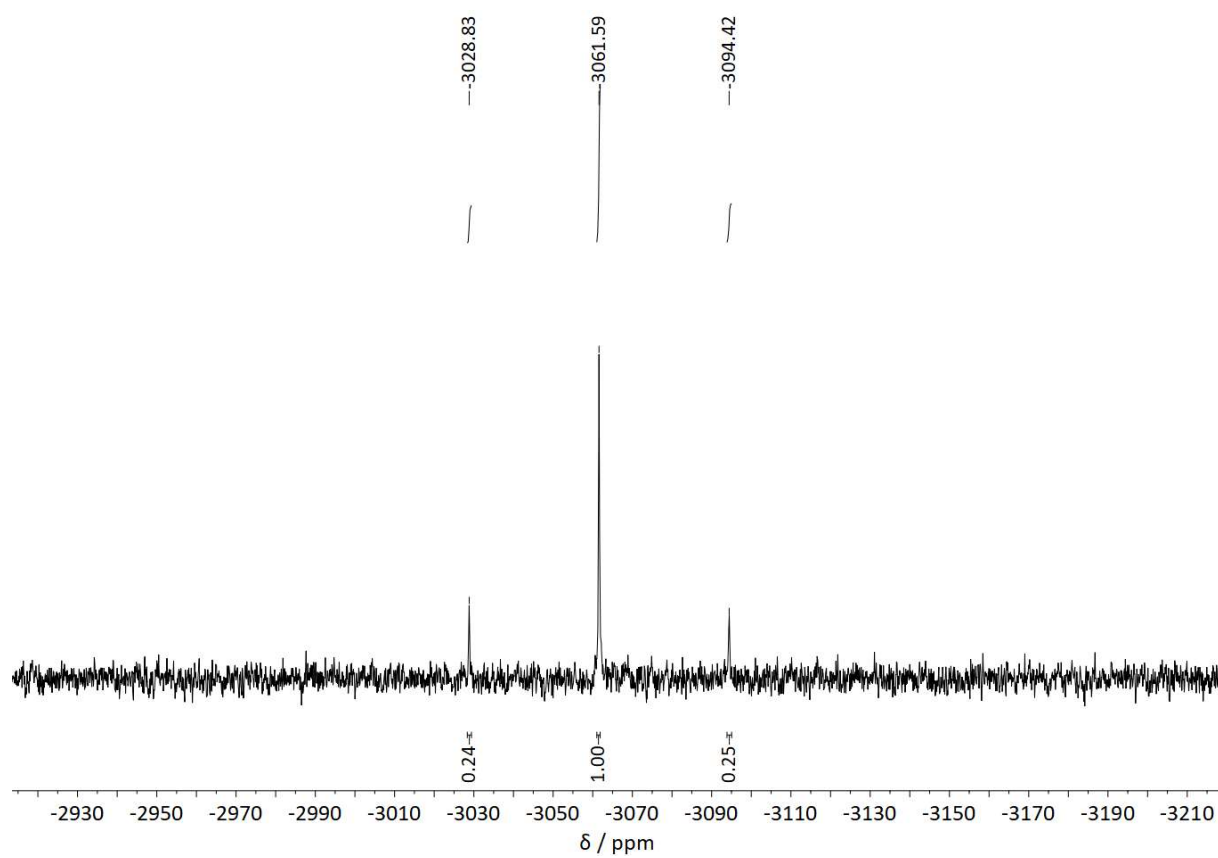

**Figure S6:**  ${}^{207}\text{Pb}$  NMR spectrum of compound **7** recorded from *en* with a  $\text{C}_6\text{D}_6$  lock capillary.

### 3. EDX

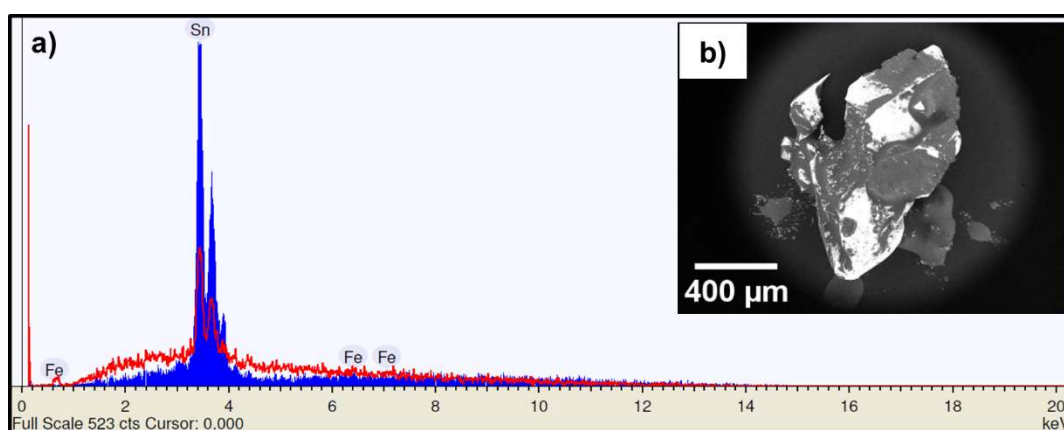

**Figure S7:** EDX analysis of **1** (a) on a broken single crystal, which is shown as a SEM microimage (b). The single crystal broke during the transfer to the sample holder.

**Table S1:** EDX analysis of compound **1**.

| Elements | mass percent<br>(exp.) / wt% | mass percent<br>(calc.) / wt% | atom percent<br>(exp.) / wt% | atom percent<br>(calc.) / wt% |
|----------|------------------------------|-------------------------------|------------------------------|-------------------------------|
| Fe       | 2.2%                         | 0.3%                          | 4.6%                         | 0.7%                          |
| Sn       | 97.8%                        | 99.7%                         | 95.4%                        | 99.3%                         |

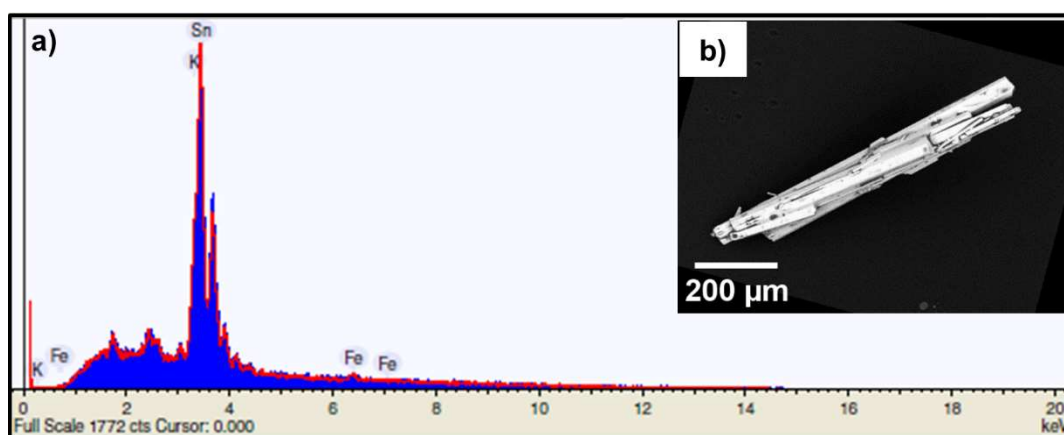

**Figure S8:** EDX analysis of **2** (a) on single crystals, which are shown as a SEM microimage (b).

Compound **2** crystallized as needles, which easily break therefore a needle pile was transferred to the sample holder.

**Table S2:** EDX analysis of compound **2**.

| Elements | mass percent<br>(exp.) / wt% | mass percent<br>(calc.) / wt% |
|----------|------------------------------|-------------------------------|
| K        | 12.7%                        | 12.7%                         |
| Fe       | 2.2%                         | 0.3%                          |
| Sn       | 85.0%                        | 87.0%                         |

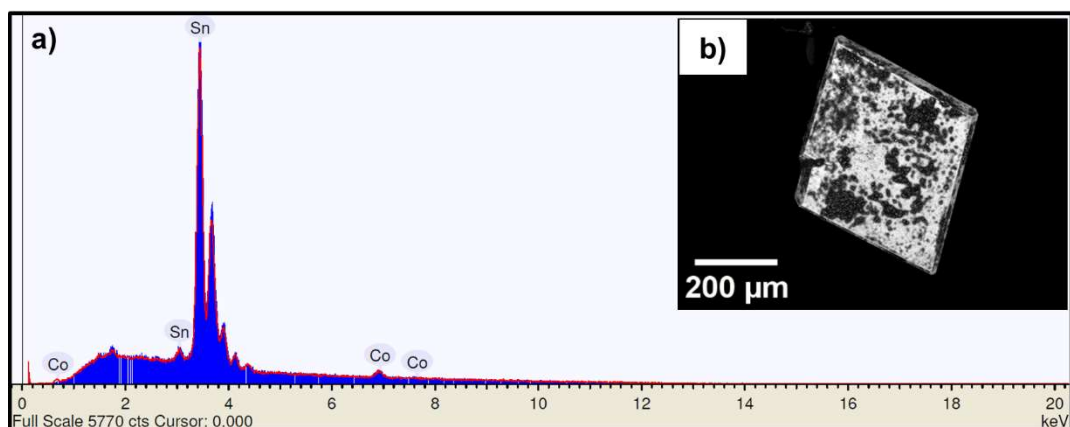

**Figure S9:** EDX analysis of **3** (a) on a single crystal, which is shown as a SEM microimage (b).

**Table S3:** EDX analysis of compound **3**.

| Elements | mass percent<br>(exp.) / wt% | mass percent<br>(calc.) / wt% | atom percent<br>(exp.) / wt% | atom percent<br>(calc.) / wt% |
|----------|------------------------------|-------------------------------|------------------------------|-------------------------------|
| Co       | 4.1%                         | 4.4%                          | 7.9%                         | 8.4%                          |
| Sn       | 96.0%                        | 95.6%                         | 92.1%                        | 91.6%                         |

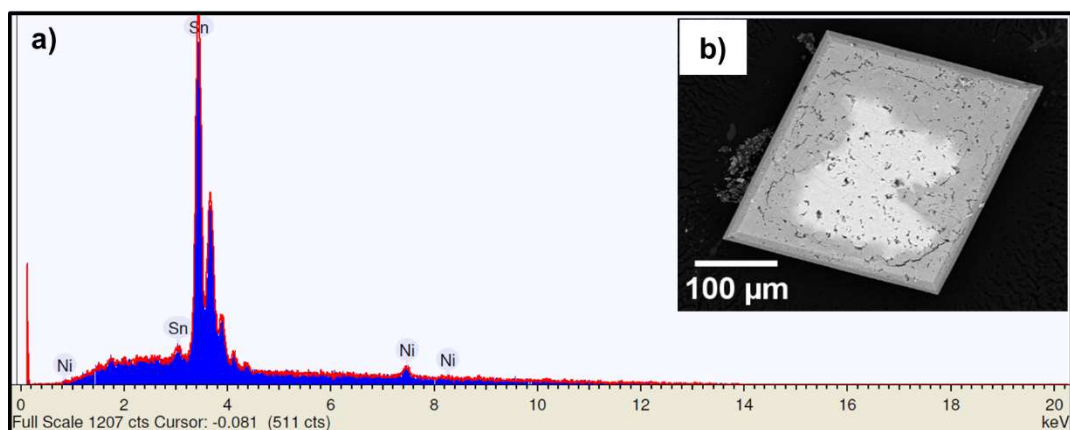

**Figure S10:** EDX analysis of **4** (a) on a single crystal, which is shown as a SEM microimage (b).

**Table S4:** EDX analysis of compound **4**.

| Elements | mass percent<br>(exp.) / wt% | mass percent<br>(calc.) / wt% | atom percent<br>(exp.) / wt% | atom percent<br>(calc.) / wt% |
|----------|------------------------------|-------------------------------|------------------------------|-------------------------------|
| Ni       | 5.1%                         | 5.2%                          | 9.8%                         | 10.0%                         |
| Sn       | 94.9%                        | 94.8%                         | 90.2%                        | 90.0%                         |

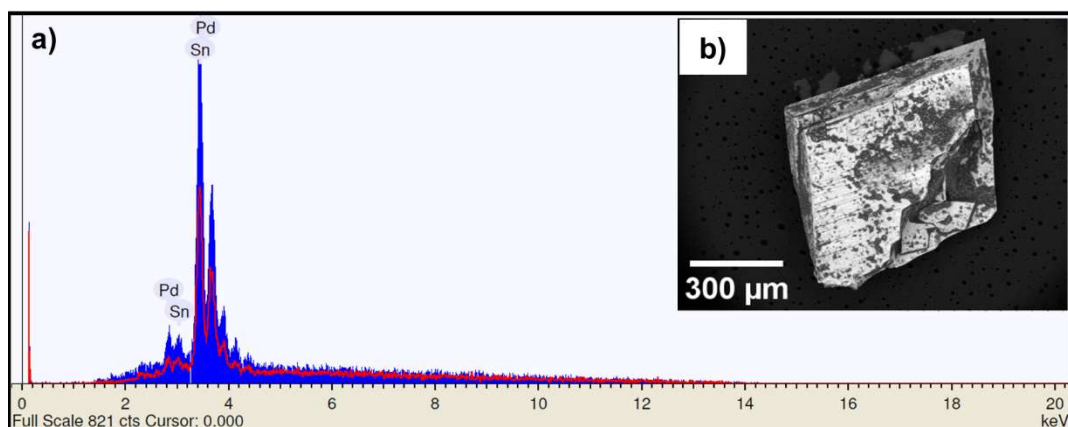

**Figure S11:** EDX analysis of **5** (a) on a broken single crystal, which is shown as a SEM microimage (b).

**Table S5:** EDX analysis of compound **5**.

| Elements | mass percent<br>(exp.) / wt% | mass percent<br>(calc.) / wt% | atom percent<br>(exp.) / wt% | atom percent<br>(calc.) / wt% |
|----------|------------------------------|-------------------------------|------------------------------|-------------------------------|
| Pd       | 5.9%                         | 7.6%                          | 6.5%                         | 8.4%                          |
| Sn       | 94.1%                        | 92.4%                         | 93.5%                        | 91.6%                         |

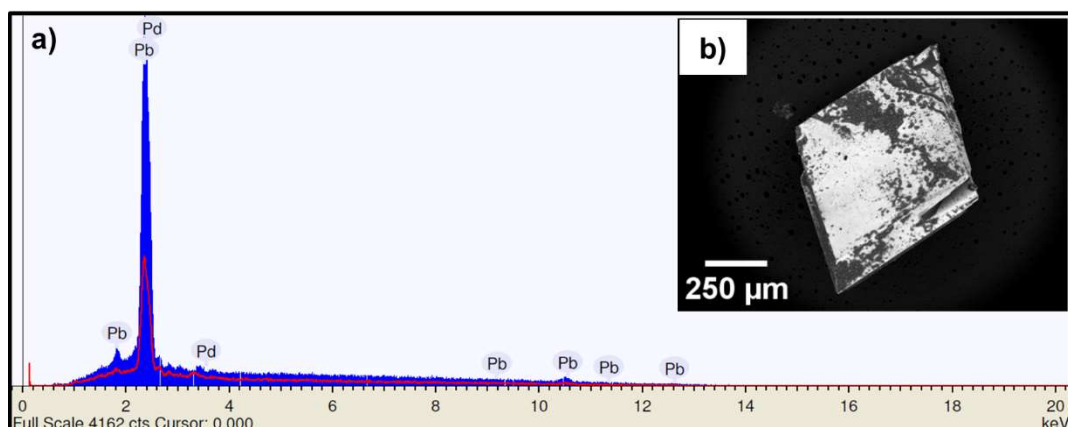

**Figure S12:** EDX analysis of **6** (a) on a single crystal, which is shown as a SEM microimage (b).

**Table S6:** EDX analysis of compound **6**.

| Elements | mass percent<br>(exp.) / wt% | mass percent<br>(calc.) / wt% | atom percent<br>(exp.) / wt% | atom percent<br>(calc.) / wt% |
|----------|------------------------------|-------------------------------|------------------------------|-------------------------------|
| Pd       | 4.3%                         | 2.6%                          | 8.0%                         | 4.9%                          |
| Pb       | 95.7%                        | 97.4%                         | 92.0%                        | 95.1%                         |

According to  $^{207}\text{Pb}$  NMR analysis of a reaction solution of compound **7** no peak besides the endohedral cluster was found. Therefore, also in single crystals of compound **7** no empty cluster should be present. However, the single crystal refinements result in an occupation of the Pt atom position of only 42.6 %, which indicates a decomposition during the crystallization. Compound **7** only crystallized in small quantities as tiny dark red single crystals besides large quantities of metallic powder. In the SEM microimage the metallic powder can be identified as small needles, which are more platinum rich than the single crystals. Therefore, we would assign the metallic needles as a decomposition product of the cluster anion **7a**.

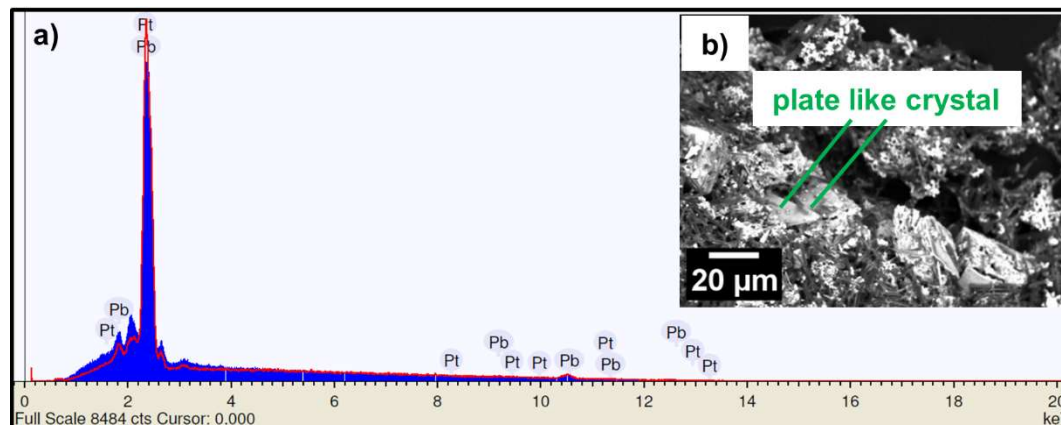

**Figure S13:** EDX analysis of **7** (a) on a single crystal in a pile of fine metallic needles, which is shown as a SEM microimage (b).

**Table S7:** EDX analysis of compound **7**.

| Elements | mass percent<br>(exp.) / wt% | mass percent<br>(calc.) / wt% | atom percent<br>(exp.) / wt% | atom percent<br>(calc.) / wt% |
|----------|------------------------------|-------------------------------|------------------------------|-------------------------------|
| Pt       | 7.6%                         | 4.2%                          | 8.0%                         | 4.5%                          |
| Pb       | 92.4%                        | 95.8%                         | 92.0%                        | 95.5%                         |

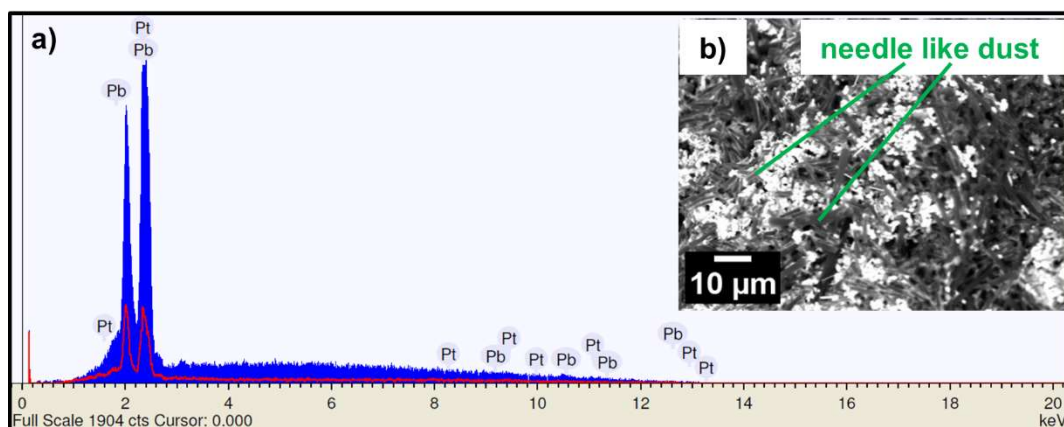

**Figure S14:** EDX analysis of the metallic powder, which precipitated as fine needles during the crystallization of compound **7** (a). The needles are shown as a SEM microimage (b).

**Table S8:** EDX analysis of the metallic needle like precipitate besides the single crystals of compound **7**.

| Elements | mass percent<br>(exp.) / wt% | atom percent<br>(exp.) / wt% |
|----------|------------------------------|------------------------------|
| Pt       | 23.0%                        | 24.1%                        |
| Pb       | 77.00                        | 75.9%                        |

#### 4. Raman

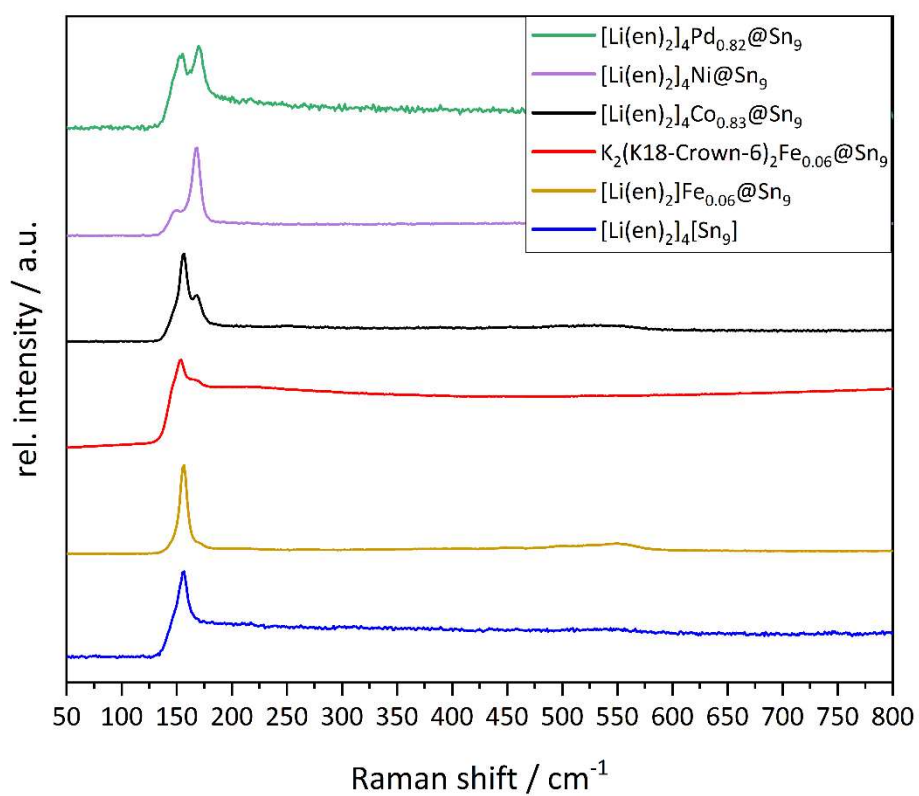

**Figure S15:** Raman spectra measured on single crystals of compound **1** to **5** and of the unfilled cluster as a reference.

## 5. PXRD

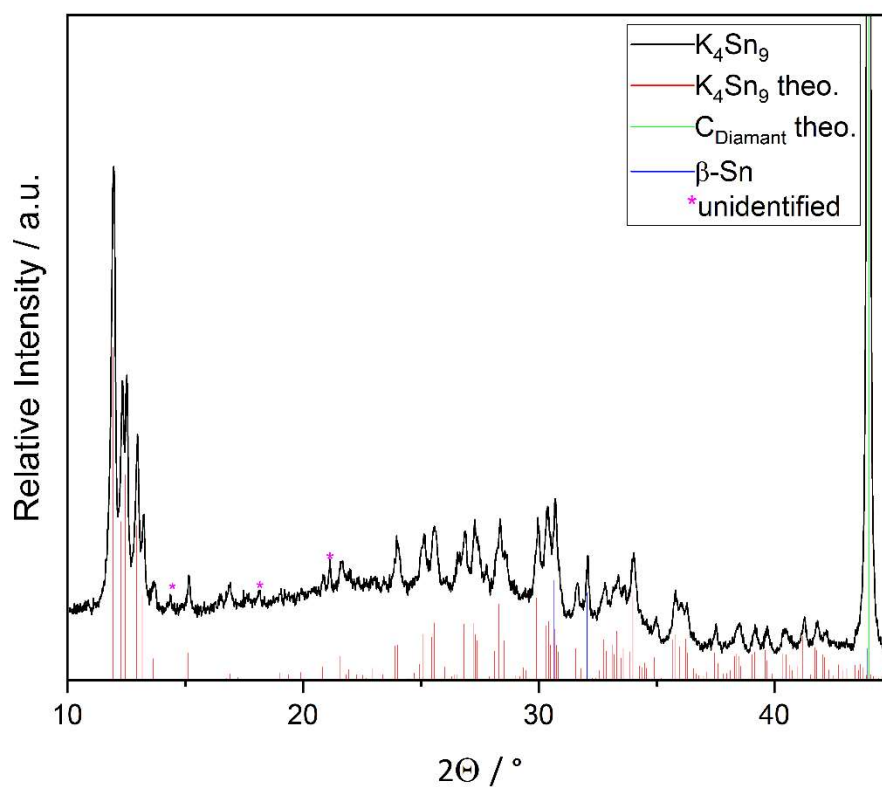

**Figure S16:** Powder diffractogram of synthesized  $K_4Sn_9$ . Diamond powder was used to dilute  $K_4Sn_9$  prior to the measurement. The intensive reflection of diamond was truncated in the figure to improve the visibility of relevant reflections.



## 5. Volume change

**Table S9:** Calculated cluster volumes, difference of volume to the empty cluster, volume increase and normalized volume increase are shown with their respective occupancy. Crystal structure data for the calculation of the cluster volume were taken from Ref.<sup>[15-21]</sup>

| compound                                                                                          | cluster                                                               | cluster volume (V <sub>c</sub> ) [Å <sup>3</sup> ] | ΔV <sub>c</sub> [Å <sup>3</sup> ] | volume increase [%] | normalized volume increase [%] | occupancy [%] |
|---------------------------------------------------------------------------------------------------|-----------------------------------------------------------------------|----------------------------------------------------|-----------------------------------|---------------------|--------------------------------|---------------|
| [Li <sub>4</sub> (en) <sub>8</sub> ][Fe <sub>0.059(3)</sub> @Sn <sub>9</sub> ]                    | [Fe@Sn <sub>9</sub> ] <sup>4-</sup> ( <b>1a</b> )                     | 33.2                                               | 0.2                               | 0.5                 | 8.1                            | 5.9           |
| [K[18]crown-6] <sub>2</sub> K <sub>2</sub><br>[Fe <sub>0.055(4)</sub> @Sn <sub>9</sub> ] · 1.5 en | [Fe@Sn <sub>9</sub> ] <sup>4-</sup> ( <b>2a</b> )                     | 33.2                                               | 0.2                               | 0.6                 | 11.2                           | 5.5           |
| [Li <sub>4</sub> (en) <sub>8</sub> ][Co <sub>0.827(5)</sub> @Sn <sub>9</sub> ]                    | [Co@Sn <sub>9</sub> ] <sup>4-</sup> ( <b>3a</b> )                     | 36.0                                               | 3.0                               | 9.1                 | 11.0                           | 83.0          |
| K[K([2.2.2]crypt)] <sub>3</sub> [Co <sub>0.68</sub> @Sn <sub>9</sub> ]                            | [Co@Sn <sub>9</sub> ] <sup>4-</sup>                                   | 35.4                                               | 2.4                               | 7.3                 | 10.8                           | 67.6          |
| K[K([2.2.2]crypt)] <sub>3</sub> [Co <sub>0.87</sub> @Sn <sub>9</sub> ]                            | [Co@Sn <sub>9</sub> ] <sup>4-</sup>                                   | 36.1                                               | 3.1                               | 9.4                 | 10.8                           | 87.0          |
| [K([2.2.2]crypt)] <sub>3</sub><br>[Co@Sn <sub>9</sub> Ni(CO)] · DMF                               | [Co@Sn <sub>9</sub> Ni(CO)] <sup>3-</sup>                             | 36.6                                               | 3.6                               | 10.8                | 10.8                           | 100.0         |
| [K([2.2.2]crypt)] <sub>3</sub><br>[Co@Sn <sub>9</sub> Ni(C <sub>2</sub> H <sub>4</sub> )] · en    | [Co@Sn <sub>9</sub> Ni(C <sub>2</sub> H <sub>4</sub> )] <sup>3-</sup> | 36.3                                               | 3.3                               | 10.1                | 10.1                           | 100.0         |
| [K([2.2.2]crypt)] <sub>6</sub><br>[Co@Sn <sub>9</sub> Pt(PPh <sub>3</sub> )] <sub>2</sub>         | [Co@Sn <sub>9</sub> Pt(PPh <sub>3</sub> )] <sup>4-</sup>              | 37.3                                               | 4.3                               | 12.9                | 12.9                           | 100.0         |
| [K([2.2.2]crypt)] <sub>3</sub><br>[Co@Sn <sub>9</sub> AuPh]                                       | [Co@Sn <sub>9</sub> AuPh] <sup>4-</sup>                               | 37.2                                               | 4.2                               | 12.7                | 12.7                           | 100.0         |
| K <sub>5</sub> Co <sub>1-x</sub> Sn <sub>9</sub>                                                  | [Co(-I)@Sn <sub>9</sub> ] <sup>5-</sup>                               | -                                                  | -                                 | 12.1                | 14.8                           | 82.0          |
| K <sub>13</sub> Co <sub>1-x</sub> Sn <sub>17</sub>                                                | [Co(-I)@Sn <sub>9</sub> ] <sup>5-</sup>                               | -                                                  | -                                 | 14.6                | 14.6                           | 100.0         |
| [Li <sub>4</sub> (en) <sub>8</sub> ][Ni@Sn <sub>9</sub> ]                                         | [Ni@Sn <sub>9</sub> ] <sup>4-</sup> ( <b>4a</b> )                     | 36.6                                               | 3.6                               | 10.9                | 10.9                           | 100.0         |
| Na <sub>12</sub> Ni <sub>1-x</sub> Sn <sub>17</sub>                                               | [Ni@Sn <sub>9</sub> ] <sup>4-</sup> -I                                | 36.2                                               | 3.2                               | 9.6                 | 10.1                           | 95.0          |
|                                                                                                   | [Ni@Sn <sub>9</sub> ] <sup>4-</sup> -II                               | 36.2                                               | 3.2                               | 9.7                 | 10.5                           | 92.6          |
| [K([18]crown-6)] <sub>3</sub> [KSn <sub>9</sub> ]<br>· 3 C <sub>6</sub> H <sub>6</sub>            | [Ni@Sn <sub>9</sub> ] <sup>4-</sup>                                   | 34.8                                               | 1.8                               | 5.4                 | 9.0                            | 60.2          |
| [K([2.2.2]crypt)] <sub>3</sub> [Ni@Sn <sub>9</sub> ]                                              | [Ni@Sn <sub>9</sub> ] <sup>4-</sup>                                   | 36.1                                               | 3.1                               | 9.5                 | 9.5                            | 100.0         |
| [K([2.2.2]crypt)] <sub>6</sub> [(Ni@Sn <sub>9</sub> ) <sub>2</sub> Cd]<br>· en                    | [(Ni@Sn <sub>9</sub> ) <sub>2</sub> Cd] <sup>6-</sup>                 | 36.1                                               | 3.1                               | 9.4                 | 9.4                            | 100.0         |
| [K([2.2.2]crypt)] <sub>5</sub> [(Ni@Sn <sub>9</sub> ) <sub>2</sub> In]<br>· DMF                   | [(Ni@Sn <sub>9</sub> ) <sub>2</sub> In] <sup>5-</sup>                 | 35.6                                               | 2.6                               | 7.7                 | 7.7                            | 100.0         |
| [K([2.2.2]crypt)] <sub>3</sub> [Cu@Sn <sub>9</sub> ]<br>· 2 DMF                                   | [Cu(+I)@Sn <sub>9</sub> ] <sup>3-</sup>                               | 37.3                                               | 4.3                               | 12.9                | 12.9                           | 100.0         |
| [K <sub>7</sub> (OH)][Ru@Sn <sub>9</sub> ] · 10 NH <sub>3</sub>                                   | [Ru(-II)@Sn <sub>9</sub> ] <sup>6-</sup>                              | -                                                  | -                                 | 17.9                | 17.9                           | 100.0         |
| [Li <sub>4</sub> (en) <sub>8</sub> ][Pd <sub>0.824(4)</sub> @Sn <sub>9</sub> ]                    | [Pd@Sn <sub>9</sub> ] <sup>4-</sup> ( <b>5a</b> )                     | 38.7                                               | 5.7                               | 17.3                | 21.1                           | 82.0          |
| K <sub>12</sub> Pd <sub>1-x</sub> Sn <sub>17</sub>                                                | [Pd@Sn <sub>9</sub> ] <sup>4-</sup> -I                                | 36.0                                               | 3.0                               | 9.1                 | 16.5                           | 55.5          |
|                                                                                                   | [Pd@Sn <sub>9</sub> ] <sup>4-</sup> -II                               | 36.2                                               | 3.2                               | 9.7                 | 18.0                           | 54.2          |
|                                                                                                   | [Pd@Sn <sub>9</sub> ] <sup>4-</sup> -III                              | 34.0                                               | 1.0                               | 3.1                 | 11.9                           | 26.1          |
| [K([2.2.2]crypt)] <sub>3</sub> [Cu@Pb <sub>9</sub> ]<br>· 2 DMF                                   | [Cu(+I)@Pb <sub>9</sub> ] <sup>3-</sup>                               | 41.7                                               | 3.0                               | 9.0                 | 9.0                            | 100.0         |
| K <sub>4</sub> RhPb <sub>9</sub>                                                                  | [Rh@Pb <sub>9</sub> ] <sup>4-</sup> -I                                | 43.3                                               | 4.6                               | 12.0                | 12.0                           | 100.0         |
|                                                                                                   | [Rh@Pb <sub>9</sub> ] <sup>4-</sup> -II                               | 44.0                                               | 5.3                               | 13.8                | 13.8                           | 100.0         |
| [Li <sub>4</sub> (en) <sub>8</sub> ][Pd <sub>0.460(5)</sub> @Pb <sub>9</sub> ]                    | [Pd@Sn <sub>9</sub> ] <sup>4-</sup> ( <b>6a</b> )                     | 40.6                                               | 1.9                               | 5.7                 | 12.4                           | 46.0          |
| [Li <sub>4</sub> (en) <sub>8</sub> ][Pt <sub>0.426(4)</sub> @Pb <sub>9</sub> ]                    | [Pt@Sn <sub>9</sub> ] <sup>4-</sup> ( <b>7a</b> )                     | 40.6                                               | 1.9                               | 5.8                 | 13.6                           | 42.6          |

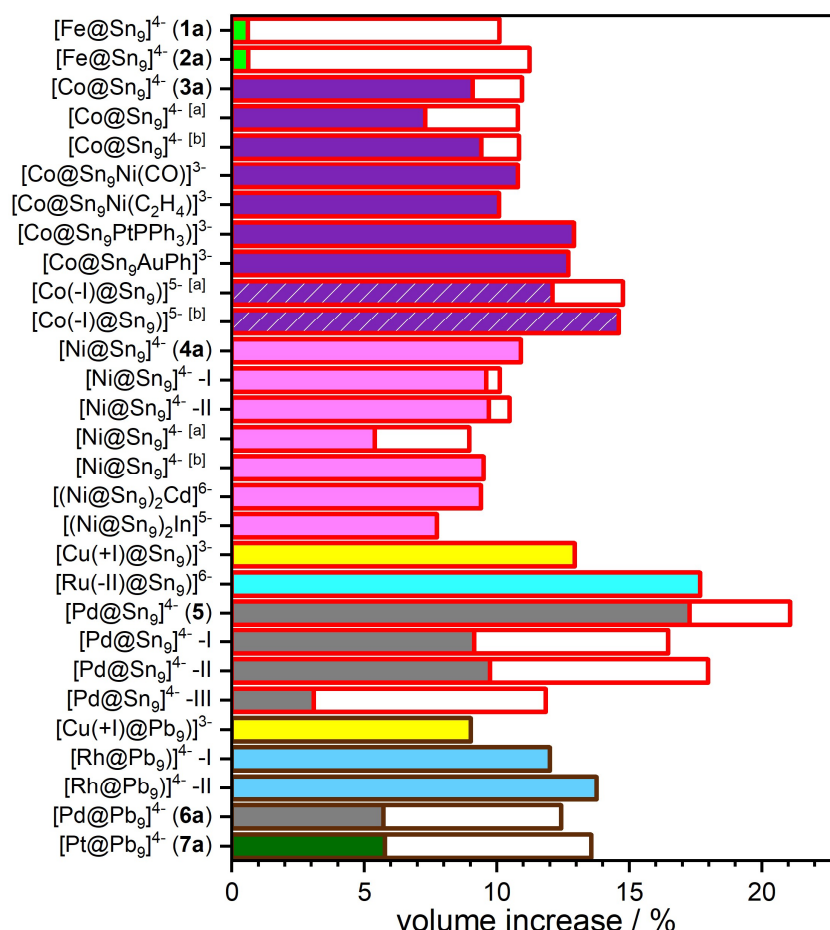

**Figure S17:** Volume increase of the endohedral clusters **1a** to **7a** and a comparison to the literature known endohedral clusters in a bar chart. The coloured bar represents the volume increase of the endohedral clusters in comparison to the empty ones, for partially occupied *TM* atoms positions the normalized volume, i.e. the volume increase extrapolated to a *TM* occupation of 100 %, is shown as an empty bar. Therefore, the sum of both bars represents the normalized volume increase. The bar filling color represents the central *TM* atom, Fe, Co, Ni, Cu, Ru, Pd, Rh, Pt, Sn and Pb are shown as bright green, purple, pink, yellow, bright blue, grey, blue, dark green, respectively. The bar frame colors indicate the cluster framework element, red and brown for Sn and Pb, respectively. For clarity, the bars for Sn<sub>9</sub> filled with negatively charged Co(-I) are dashed with white lines. If a cluster was present in more than one structure, it is indicated by [a] and [b]. In compounds with two crystallographically independent cluster anions, the anions are individually analyzed and displayed with roman numbers. The second bar has the same frame color as the first one and the bar filling is always empty. References see Table S9.

## 6. Crystallographic details

**Table S10:** Crystallographic data and details of the structure determinations of compounds **1** and **2**.

| compound                                                       | [Li <sub>4</sub> (en) <sub>8</sub> ][Fe <sub>0.059(3)</sub> @Sn <sub>9</sub> ]<br>( <b>1</b> )     | [K([18]crown-6)] <sub>2</sub> K <sub>2</sub><br>[Fe <sub>0.055(4)</sub> @Sn <sub>9</sub> ] · 1.5 en ( <b>2</b> ) |
|----------------------------------------------------------------|----------------------------------------------------------------------------------------------------|------------------------------------------------------------------------------------------------------------------|
| formula                                                        | C <sub>16</sub> H <sub>64</sub> Fe <sub>0.06</sub> Li <sub>4</sub> N <sub>16</sub> Sn <sub>9</sub> | C <sub>27</sub> H <sub>60</sub> Fe <sub>0.06</sub> K <sub>4</sub> N <sub>3</sub> O <sub>12</sub> Sn <sub>9</sub> |
| fw [g·mol <sup>-1</sup> ]                                      | 1580.15                                                                                            | 1846.46                                                                                                          |
| space group                                                    | <i>P</i> $\bar{1}$ (no. 2)                                                                         | <i>P</i> 2 <sub>1</sub> / <i>n</i> (no. 14)                                                                      |
| <i>a</i> [Å]                                                   | 12.2812(4)                                                                                         | 10.4131(2)                                                                                                       |
| <i>b</i> [Å]                                                   | 12.5497(4)                                                                                         | 25.7429(7)                                                                                                       |
| <i>c</i> [Å]                                                   | 17.7177(5)                                                                                         | 20.7178(4)                                                                                                       |
| $\alpha$ [°]                                                   | 75.249(2)                                                                                          | 90                                                                                                               |
| $\beta$ [°]                                                    | 71.320(2)                                                                                          | 102.491(2)                                                                                                       |
| $\gamma$ [°]                                                   | 62.721(2)                                                                                          | 90                                                                                                               |
| <i>V</i> [Å <sup>3</sup> ]                                     | 2280.27(13)                                                                                        | 5422.2(2)                                                                                                        |
| <i>Z</i>                                                       | 2                                                                                                  | 4                                                                                                                |
| <i>T</i> [K]                                                   | 150(2)                                                                                             | 150(2)                                                                                                           |
| $\lambda$ [Å]                                                  | 0.71073                                                                                            | 0.71073                                                                                                          |
| $\rho_{\text{calcd}}$ [g·cm <sup>-3</sup> ]                    | 2.301                                                                                              | 2.262                                                                                                            |
| $\mu$ [mm <sup>-1</sup> ]                                      | 4.889                                                                                              | 4.439                                                                                                            |
| collected reflections                                          | 49827                                                                                              | 82581                                                                                                            |
| <i>R</i> <sub>int</sub>                                        | 0.0259                                                                                             | 0.0758                                                                                                           |
| independent reflections                                        | 8945                                                                                               | 10639                                                                                                            |
| reflections > 2 $\sigma(I)$                                    | 7236                                                                                               | 8383                                                                                                             |
| parameters / restraints                                        | 411 / 0                                                                                            | 526 / 12                                                                                                         |
| <i>R</i> <sub>1</sub> [ <i>I</i> > 2 $\sigma(I)$ / all data]   | 0.0273 / 0.0383                                                                                    | 0.0368 / 0.0529                                                                                                  |
| w <i>R</i> <sub>2</sub> [ <i>I</i> > 2 $\sigma(I)$ / all data] | 0.0694 / 0.0721                                                                                    | 0.0825 / 0.0893                                                                                                  |
| goodness of fit                                                | 1.013                                                                                              | 1.028                                                                                                            |
| max./min. difference<br>electron density [e/Å <sup>-3</sup> ]  | 1.744 / -1.305                                                                                     | 1.663 / -1.250                                                                                                   |
| depository no.                                                 | CCDC-2300165                                                                                       | CCDC-2300166                                                                                                     |

**Table S11:** Crystallographic data and details of the structure determinations of compounds **3**, **4** and **5**.

| compound                                                      | [Li <sub>4</sub> (en) <sub>8</sub> ][Co <sub>0.827(5)</sub> @Sn <sub>9</sub> ] ( <b>3</b> )        | [Li <sub>4</sub> (en) <sub>8</sub> ][Ni@Sn <sub>9</sub> ] ( <b>4</b> )            | [Li <sub>4</sub> (en) <sub>8</sub> ][Pd <sub>0.824(4)</sub> @Sn <sub>9</sub> ] ( <b>5</b> )        |
|---------------------------------------------------------------|----------------------------------------------------------------------------------------------------|-----------------------------------------------------------------------------------|----------------------------------------------------------------------------------------------------|
| formula                                                       | C <sub>16</sub> H <sub>64</sub> Co <sub>0.83</sub> Li <sub>4</sub> N <sub>16</sub> Sn <sub>9</sub> | C <sub>16</sub> H <sub>64</sub> Li <sub>4</sub> N <sub>16</sub> NiSn <sub>9</sub> | C <sub>16</sub> H <sub>64</sub> Pd <sub>0.82</sub> Li <sub>4</sub> N <sub>16</sub> Sn <sub>9</sub> |
| fw [g·mol <sup>-1</sup> ]                                     | 1625.56                                                                                            | 1635.51                                                                           | 1664.58                                                                                            |
| space group                                                   | <i>Pbcn</i> (no. 60)                                                                               | <i>Pbcn</i> (no. 60)                                                              | <i>Pbcn</i> (no. 60)                                                                               |
| <i>a</i> [Å]                                                  | 14.2610(4)                                                                                         | 14.3235(4)                                                                        | 14.3052(7)                                                                                         |
| <i>b</i> [Å]                                                  | 17.3545(4)                                                                                         | 17.3470(4)                                                                        | 17.3899(7)                                                                                         |
| <i>c</i> [Å]                                                  | 18.8690(4)                                                                                         | 18.8930(5)                                                                        | 18.9589(11)                                                                                        |
| $\alpha$ [°]                                                  | 90                                                                                                 | 90                                                                                | 90                                                                                                 |
| $\beta$ [°]                                                   | 90                                                                                                 | 90                                                                                | 90                                                                                                 |
| $\gamma$ [°]                                                  | 90                                                                                                 | 90                                                                                | 90                                                                                                 |
| <i>V</i> [Å <sup>3</sup> ]                                    | 4669.9(2)                                                                                          | 4694.3(2)                                                                         | 4716.3(4)                                                                                          |
| <i>Z</i>                                                      | 4                                                                                                  | 4                                                                                 | 4                                                                                                  |
| <i>T</i> [K]                                                  | 150(2)                                                                                             | 150(2)                                                                            | 150(2)                                                                                             |
| $\lambda$ [Å]                                                 | 0.71073                                                                                            | 0.71073                                                                           | 0.71073                                                                                            |
| $\rho_{\text{calcd}}$ [g·cm <sup>-3</sup> ]                   | 2.312                                                                                              | 2.314                                                                             | 2.344                                                                                              |
| $\mu$ [mm <sup>-1</sup> ]                                     | 5.041                                                                                              | 5.122                                                                             | 5.015                                                                                              |
| collected reflections                                         | 50558                                                                                              | 41393                                                                             | 29654                                                                                              |
| <i>R</i> <sub>int</sub>                                       | 0.0403                                                                                             | 0.0279                                                                            | 0.1054                                                                                             |
| independent reflections                                       | 4590                                                                                               | 4621                                                                              | 4648                                                                                               |
| reflections > 2 $\sigma(I)$                                   | 3817                                                                                               | 4064                                                                              | 3037                                                                                               |
| parameters / restraints                                       | 210 / 0                                                                                            | 209 / 0                                                                           | 210 / 0                                                                                            |
| <i>R</i> <sub>1</sub> [ <i>I</i> > 2 $\sigma(I)$ / all data]  | 0.0347 / 0.0460                                                                                    | 0.0216 / 0.0277                                                                   | 0.0526 / 0.0994                                                                                    |
| <i>wR</i> <sub>2</sub> [ <i>I</i> > 2 $\sigma(I)$ / all data] | 0.0714 / 0.0755                                                                                    | 0.0534 / 0.0554                                                                   | 0.1093 / 0.1288                                                                                    |
| goodness of fit                                               | 1.036                                                                                              | 1.038                                                                             | 1.019                                                                                              |
| max./min. difference electron density [e/Å <sup>-3</sup> ]    | 2.131 / -2.956                                                                                     | 0.618 / -0.731                                                                    | 1.682 / -1.367                                                                                     |
| depository no.                                                | CCDC-2300167                                                                                       | CCDC-2300168                                                                      | CCDC-2300170                                                                                       |

**Table S12:** Crystallographic data and details of the structure determinations of compounds **6**, and **7**.

| compound                                                      | [Li <sub>4</sub> (en) <sub>8</sub> ][Pd <sub>0.460(5)</sub> @Pb <sub>9</sub> ]<br>(6)              | [Li <sub>4</sub> (en) <sub>8</sub> ][Pt <sub>0.426(4)</sub> @Pb <sub>9</sub> ]<br>(7)              |
|---------------------------------------------------------------|----------------------------------------------------------------------------------------------------|----------------------------------------------------------------------------------------------------|
| formula                                                       | C <sub>16</sub> H <sub>64</sub> Li <sub>4</sub> N <sub>16</sub> Pb <sub>9</sub> Pd <sub>0.46</sub> | C <sub>16</sub> H <sub>64</sub> Li <sub>4</sub> N <sub>16</sub> Pb <sub>9</sub> Pt <sub>0.43</sub> |
| fw [g·mol <sup>-1</sup> ]                                     | 2422.24                                                                                            | 2456.70                                                                                            |
| space group                                                   | <i>Pbcn</i> (no. 60)                                                                               | <i>Pbcn</i> (no. 60)                                                                               |
| <i>a</i> [Å]                                                  | 14.2941(6)                                                                                         | 14.2677(3)                                                                                         |
| <i>b</i> [Å]                                                  | 17.4447(8)                                                                                         | 17.4540(4)                                                                                         |
| <i>c</i> [Å]                                                  | 19.0306(11)                                                                                        | 18.9631(5)                                                                                         |
| $\alpha$ [°]                                                  | 90                                                                                                 | 90                                                                                                 |
| $\beta$ [°]                                                   | 90                                                                                                 | 90                                                                                                 |
| $\gamma$ [°]                                                  | 90                                                                                                 | 90                                                                                                 |
| <i>V</i> [Å <sup>3</sup> ]                                    | 4745.4(4)                                                                                          | 4722.35(19)                                                                                        |
| <i>Z</i>                                                      | 4                                                                                                  | 4                                                                                                  |
| <i>T</i> [K]                                                  | 150(2)                                                                                             | 150(2)                                                                                             |
| $\lambda$ [Å]                                                 | 0.71073                                                                                            | 0.71073                                                                                            |
| $\rho_{\text{calcd}}$ [g·cm <sup>-3</sup> ]                   | 3.390                                                                                              | 3.455                                                                                              |
| $\mu$ [mm <sup>-1</sup> ]                                     | 32.002                                                                                             | 33.248                                                                                             |
| collected reflections                                         | 28704                                                                                              | 47963                                                                                              |
| <i>R</i> <sub>int</sub>                                       | 0.0830                                                                                             | 0.0990*                                                                                            |
| independent reflections                                       | 4668                                                                                               | 4644                                                                                               |
| reflections > 2 $\sigma(I)$                                   | 3367                                                                                               | 3352                                                                                               |
| parameters / restraints                                       | 210 / 0                                                                                            | 210 / 0                                                                                            |
| <i>R</i> <sub>1</sub> [ <i>I</i> > 2 $\sigma(I)$ / all data]  | 0.0410 / 0.0741                                                                                    | 0.0547 / 0.0916                                                                                    |
| <i>wR</i> <sub>2</sub> [ <i>I</i> > 2 $\sigma(I)$ / all data] | 0.0787 / 0.0890                                                                                    | 0.0915 / 0.1059                                                                                    |
| goodness of fit                                               | 1.024                                                                                              | 1.134                                                                                              |
| max./min. diff. el. density<br>[e/Å <sup>-3</sup> ]           | 2.151 / -2.817                                                                                     | 2.107 / -2.354                                                                                     |
| depository no.                                                | CCDC-2300169                                                                                       | CCDC-2300171                                                                                       |

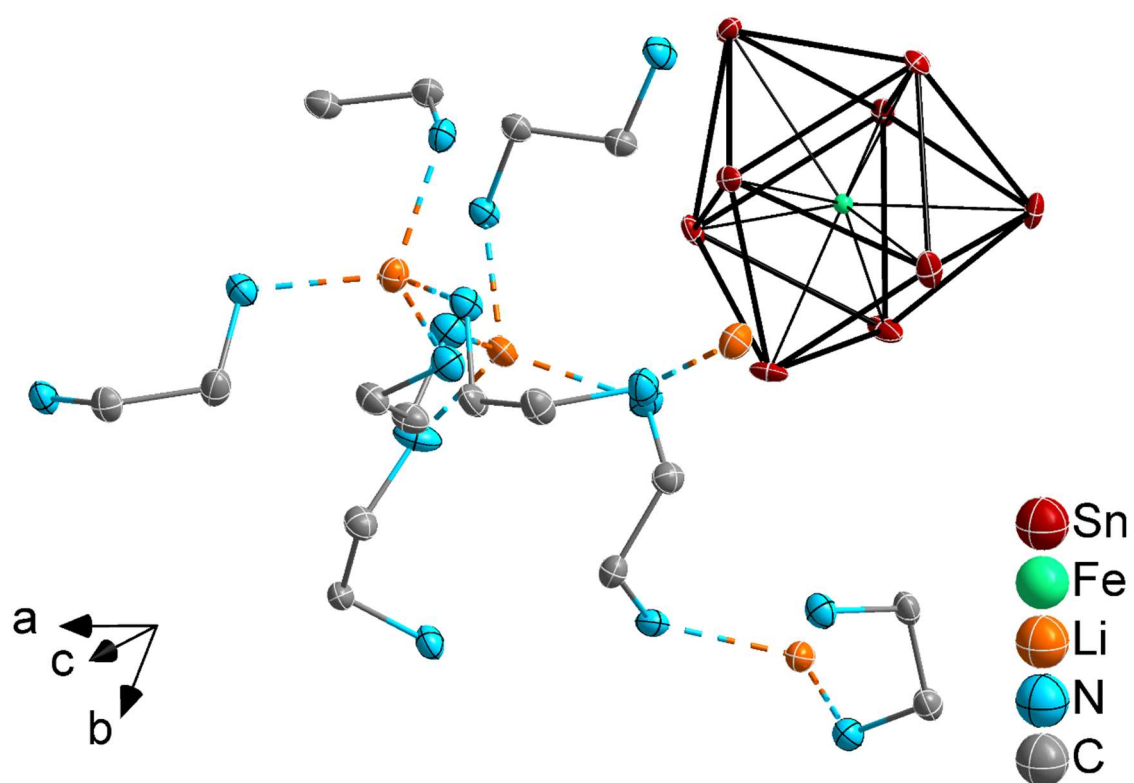

**Figure S18:** The asymmetric unit of compound **1**. Thermal ellipsoids are drawn at 50% probability. Hydrogen atoms are omitted for clarity.

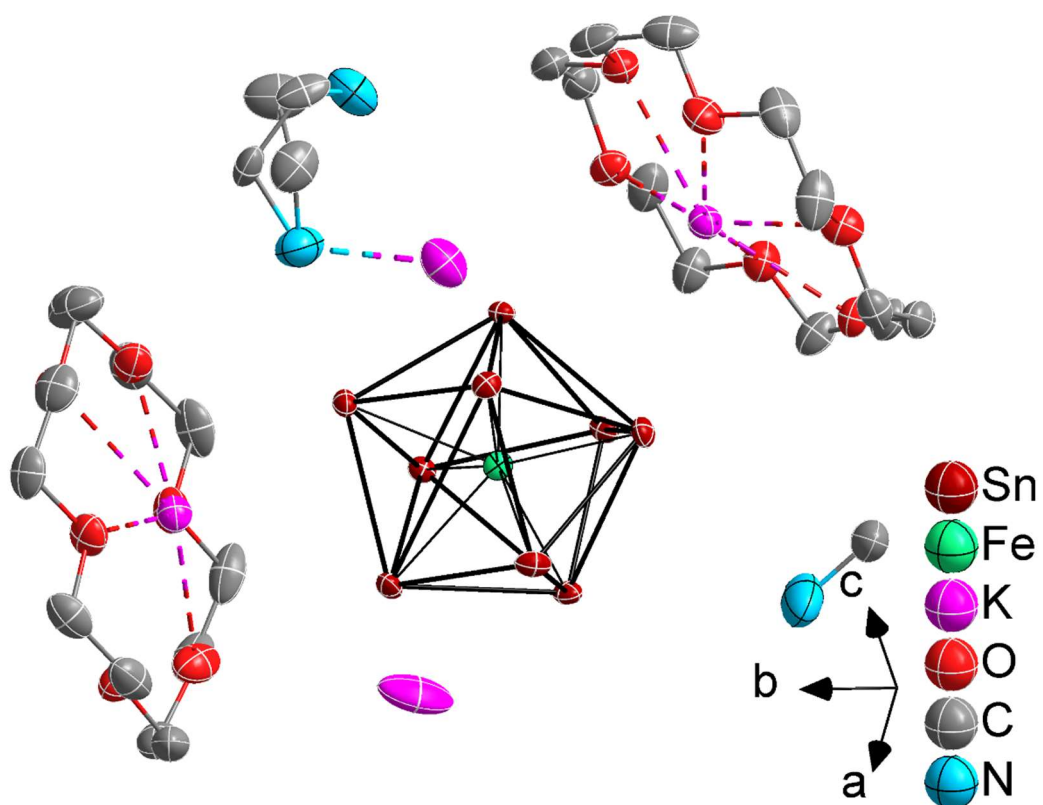

**Figure S19:** The asymmetric unit of compound **2**. Thermal ellipsoids are drawn at 50% probability. Hydrogen atoms are omitted for clarity.

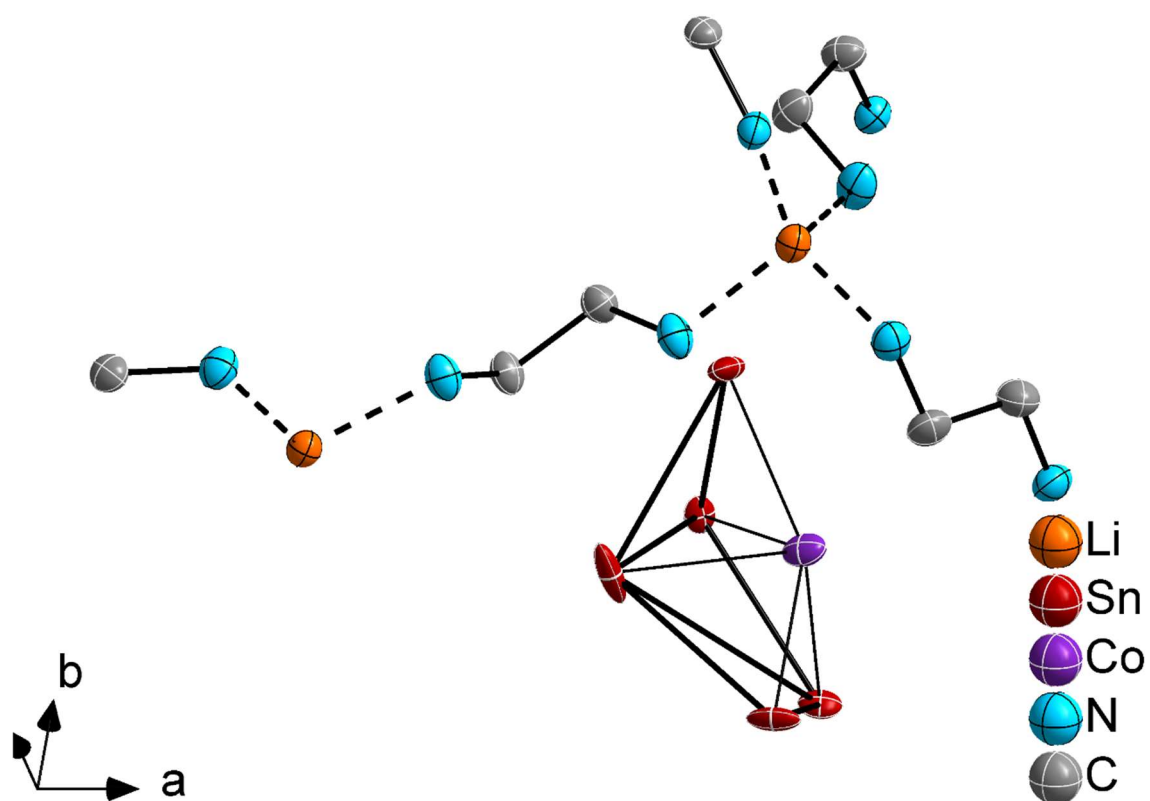

**Figure S20:** The asymmetric unit of compound **3**. Thermal ellipsoids are drawn at 50% probability. Hydrogen atoms are omitted for clarity.

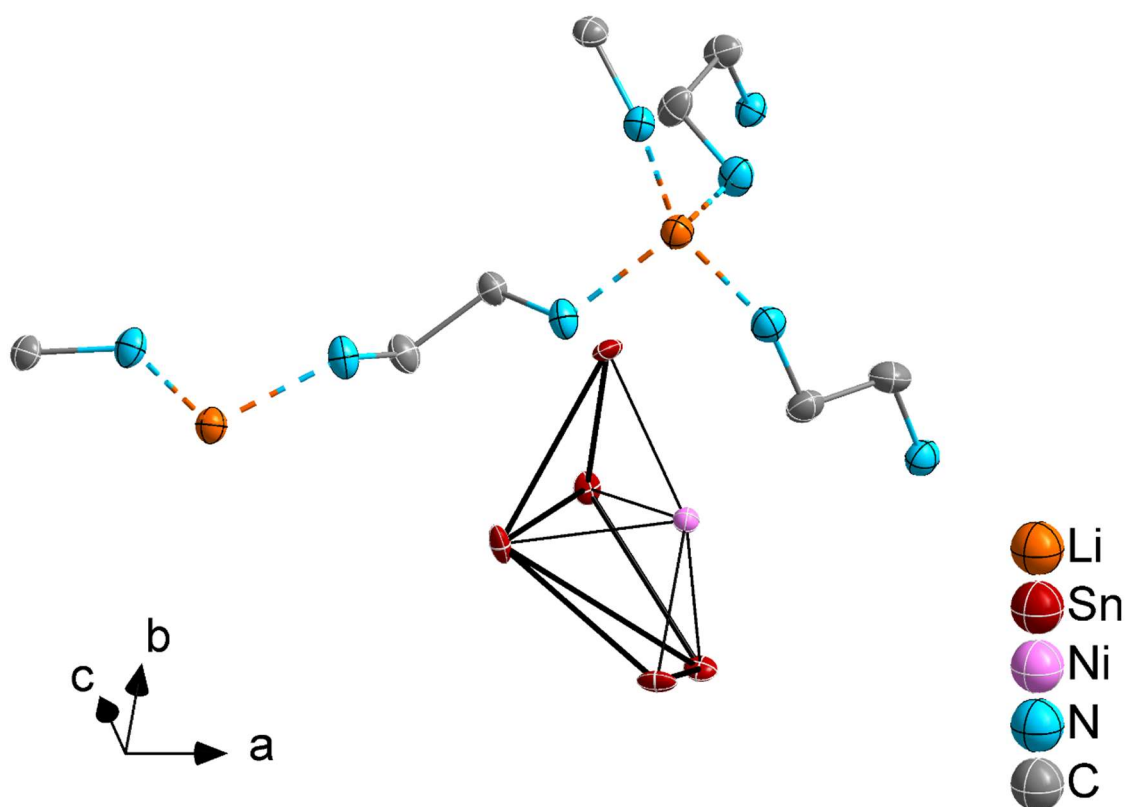

**Figure S21:** The asymmetric unit of compound **4**. Thermal ellipsoids are drawn at 50% probability. Hydrogen atoms are omitted for clarity.

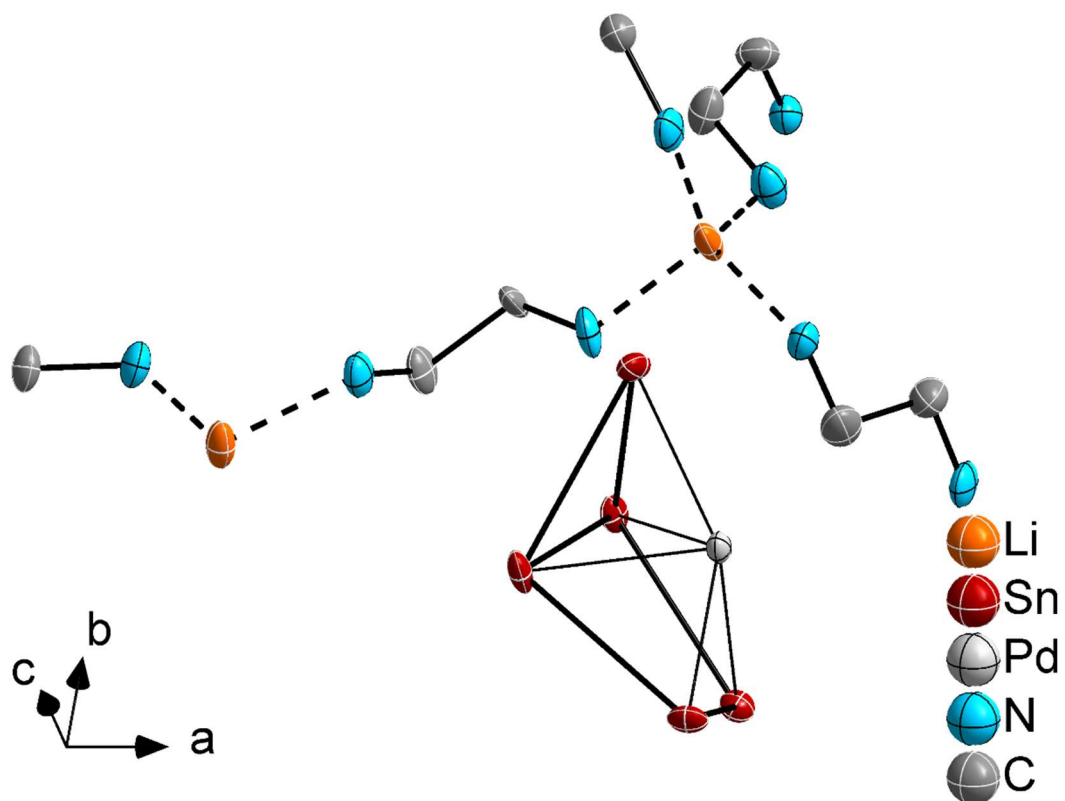

**Figure S22:** The asymmetric unit of compound **5**. Thermal ellipsoids are drawn at 50% probability. Hydrogen atoms are omitted for clarity.

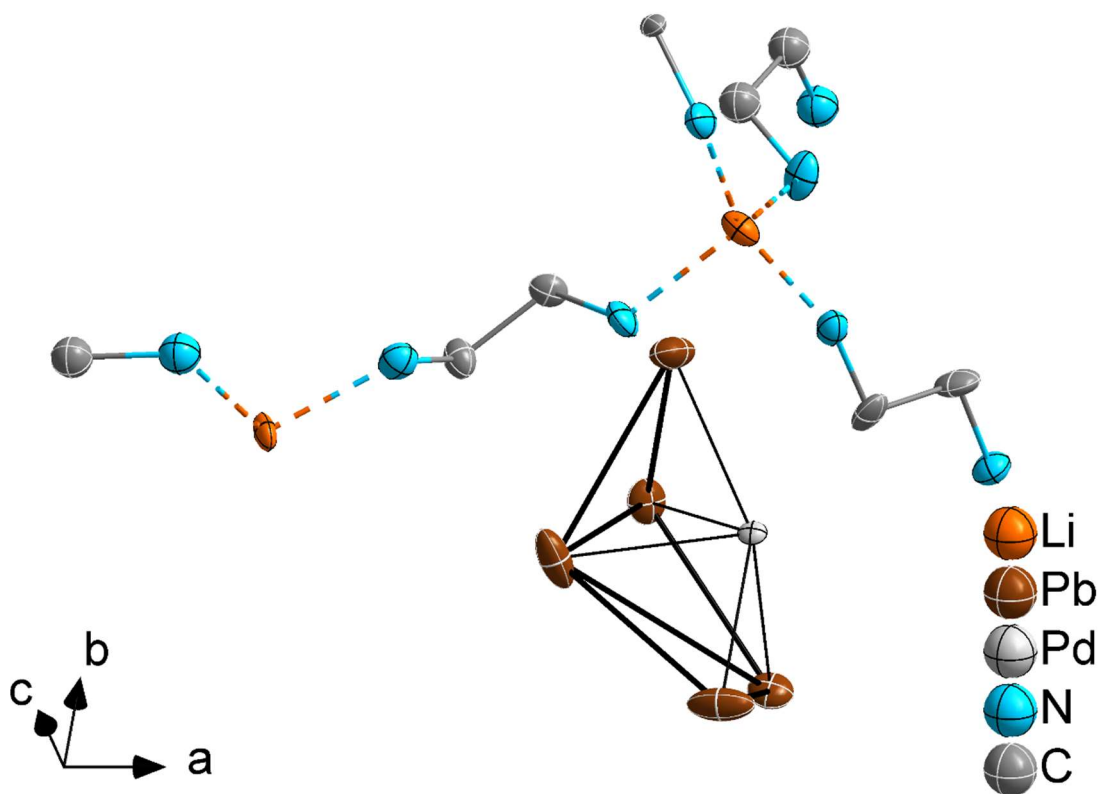

**Figure S23:** The asymmetric unit of compound **6**. Thermal ellipsoids are drawn at 50% probability. Hydrogen atoms are omitted for clarity.



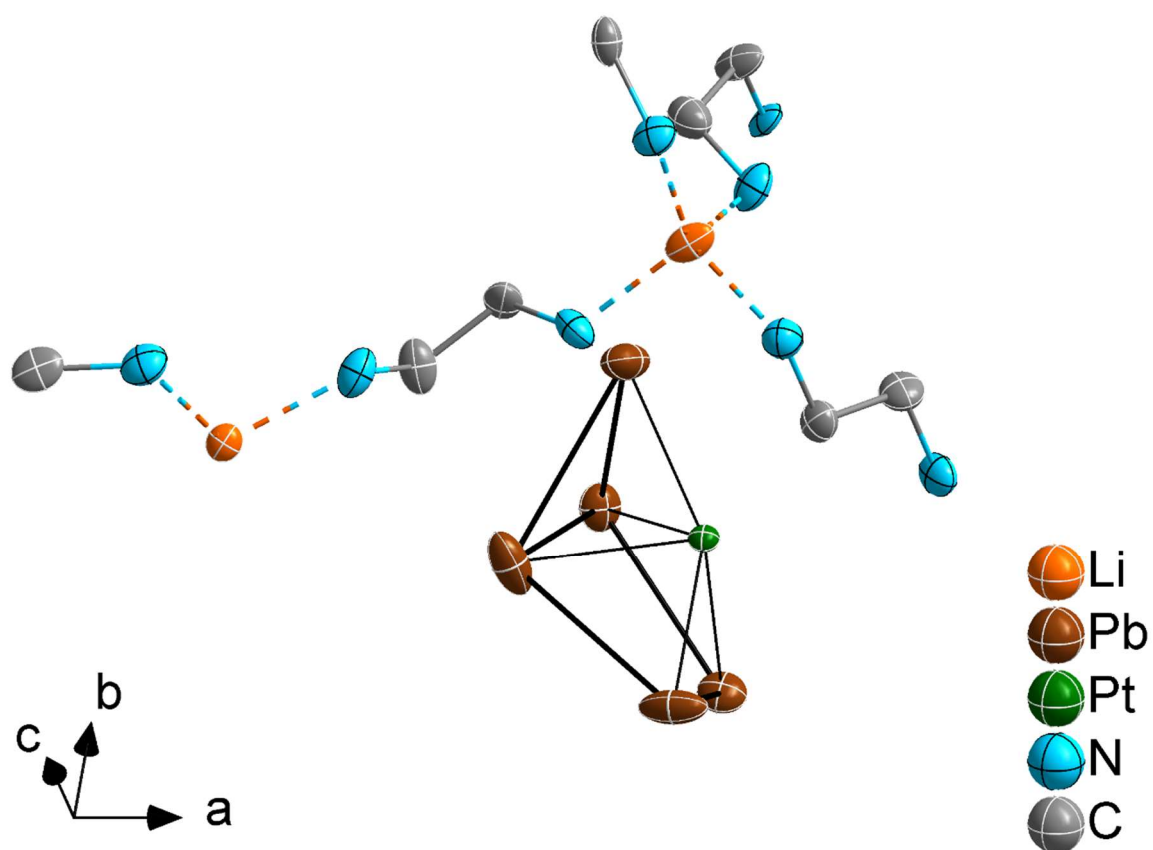

**Figure S24:** The asymmetric unit of compound **7**. Thermal ellipsoids are drawn at 50% probability. Hydrogen atoms are omitted for clarity.

**Table S13.** Selected interatomic distances in **1**.

| Atom 1 | Atom 2 | distance<br>[Å] | Atom 1 | Atom 2 | distance<br>[Å] |
|--------|--------|-----------------|--------|--------|-----------------|
| Sn1    | Sn2    | 2.9564(5)       | Li1    | N1     | 2.047(11)       |
|        | Sn4    | 2.9641(8)       |        | N6     | 2.074(9)        |
|        | Sn5    | 2.9362(5)       |        | N16    | 2.078(9)        |
|        | Sn6    | 3.0070(4)       |        | N4     | 2.094(10)       |
| Sn2    | Sn3    | 2.9675(8)       | Li2    | N2     | 2.062(9)        |
|        | Sn6    | 2.9646(5)       |        | N3     | 2.064(10)       |
|        | Sn7    | 2.9947(5)       |        | N7     | 2.083(8)        |
| Sn3    | Sn4    | 2.9784(5)       | Li3    | N5     | 2.084(11)       |
|        | Sn7    | 2.9653(5)       |        | N9     | 2.068(8)        |
|        | Sn8    | 2.9359(5)       |        | N11    | 2.070(12)       |
| Sn4    | Sn5    | 2.9589(5)       | Li4    | N8     | 2.075(7)        |
|        | Sn8    | 2.9838(6)       |        | N13    | 2.090(10)       |
| Sn5    | Sn9    | 2.9683(5)       |        | N10    | 2.063(10)       |
|        | Sn6    | 3.2880(5)       |        | N15    | 2.075(7)        |
| Sn6    | Sn7    | 3.0907(7)       |        | N14    | 2.085(9)        |
|        | Sn9    | 2.9554(6)       |        | N12    | 2.086(9)        |
| Sn7    | Sn9    | 2.9293(4)       |        |        |                 |
| Sn8    | Sn9    | 2.9796(6)       |        |        |                 |
| Fe     | Sn1    | 2.626(12)       |        |        |                 |
|        | Sn2    | 2.551(9)        |        |        |                 |
|        | Sn3    | 2.585(11)       |        |        |                 |
|        | Sn4    | 2.559(9)        |        |        |                 |
|        | Sn5    | 2.416(8)        |        |        |                 |
|        | Sn6    | 2.479(12)       |        |        |                 |
|        | Sn7    | 2.469(9)        |        |        |                 |
|        | Sn8    | 2.457(13)       |        |        |                 |
|        | Sn9    | 2.841(8)        |        |        |                 |

**Table S14.** Selected interatomic distances in **2**

| Atom 1 | Atom 2 | distance [Å] | Atom 1 | Atom 2 | distance [Å] |
|--------|--------|--------------|--------|--------|--------------|
| Sn1    | Sn2    | 2.9467(6)    | K1     | O1     | 2.896(4)     |
|        | Sn4    | 2.9289(7)    |        | O2     | 2.823(4)     |
|        | Sn5    | 2.9920(7)    |        | O3     | 2.890(4)     |
|        | Sn6    | 2.9879(6)    |        | O4     | 2.941(4)     |
| Sn2    | Sn3    | 2.9800(7)    |        | O5     | 2.813(5)     |
|        | Sn6    | 2.9890(7)    | K2     | O6     | 2.906(4)     |
|        | Sn7    | 2.9616(6)    |        | O7     | 2.972(5)     |
| Sn3    | Sn4    | 2.9563(6)    |        | O8     | 2.831(4)     |
|        | Sn7    | 2.9625(6)    |        | O9     | 2.925(5)     |
|        | Sn8    | 2.9874(7)    |        | O10    | 2.904(5)     |
| Sn4    | Sn5    | 2.9964(7)    |        | O11    | 2.952(4)     |
|        | Sn8    | 2.9401(6)    |        | O12    | 2.861(5)     |
| Sn5    | Sn6    | 3.1735(6)    | K3     | N1     | 3.072(7)     |
|        | Sn8    | 3.2187(6)    |        | N2     | 2.761(8)     |
|        | Sn9    | 2.9597(5)    |        |        |              |
| Sn6    | Sn7    | 3.2259(6)    |        |        |              |
|        | Sn9    | 2.9674(7)    |        |        |              |
| Sn7    | Sn8    | 3.2702(6)    |        |        |              |
|        | Sn9    | 2.9421(7)    |        |        |              |
| Sn8    | Sn9    | 2.9498(6)    |        |        |              |
| Fe     | Sn1    | 2.571(11)    |        |        |              |
|        | Sn2    | 2.635(13)    |        |        |              |
|        | Sn3    | 2.564(13)    |        |        |              |
|        | Sn4    | 2.575(12)    |        |        |              |
|        | Sn5    | 2.456(12)    |        |        |              |
|        | Sn6    | 2.478(13)    |        |        |              |
|        | Sn7    | 2.462(11)    |        |        |              |
|        | Sn8    | 2.450(13)    |        |        |              |
|        | Sn9    | 2.812(13)    |        |        |              |

**Table S15.** Selected interatomic distances in **3**

| Atom 1 | Atom 2 | distance [Å] | Atom 1 | Atom 2 | distance [Å] |
|--------|--------|--------------|--------|--------|--------------|
| Sn1    | Sn2    | 2.9942(5)    | Li1    | N1     | 2.040(11)    |
|        | Sn4    | 3.0310(6)    |        | N3     | 2.063(11)    |
| Sn2    | Sn3    | 3.0309(6)    |        | N5     | 2.068(11)    |
|        | Sn4    | 3.0581(7)    | Li2    | N7     | 2.089(10)    |
|        | Sn5    | 3.1177(7)    |        | N2     | 2.047(10)    |
| Sn3    | Sn4    | 3.0121(7)    |        | N4     | 2.103(10)    |
|        | Sn5    | 2.9818(7)    |        | N6     | 2.064(10)    |
| Sn3'   | Sn5    | 3.0052(6)    |        | N8     | 2.043(11)    |
| Sn4    | Sn5    | 3.1021(7)    |        |        |              |
| Co     | Sn1    | 2.6264(13)   |        |        |              |
|        | Sn2    | 2.5723(6)    |        |        |              |
|        | Sn3    | 2.7005(7)    |        |        |              |
|        | Sn4    | 2.5936(6)    |        |        |              |
|        | Sn5    | 2.5835(10)   |        |        |              |

**Table S16.** Selected interatomic distances in **4**.

| Atom 1 | Atom 2 | distance [Å] | Atom 1 | Atom 2 | distance [Å] |
|--------|--------|--------------|--------|--------|--------------|
| Sn1    | Sn2    | 3.0030(4)    | Li1    | N1     | 2.050(6)     |
|        | Sn4    | 3.0445(4)    |        | N3     | 2.058(6)     |
| Sn2    | Sn3    | 3.0352(5)    |        | N5     | 2.057(6)     |
|        | Sn4    | 3.0935(5)    | Li2    | N7     | 2.106(6)     |
|        | Sn5    | 3.0968(5)    |        | N2     | 2.059(6)     |
| Sn3    | Sn4    | 3.0203(5)    |        | N4     | 2.097(6)     |
|        | Sn5    | 3.0113(5)    |        | N6     | 2.070(6)     |
| Sn3'   | Sn5    | 3.0391(4)    |        | N8     | 2.054(6)     |
| Sn4    | Sn5    | 3.0893(5)    |        |        |              |
| Ni     | Sn1    | 2.6484(6)    |        |        |              |
|        | Sn2    | 2.5963(4)    |        |        |              |
|        | Sn3    | 2.6797(4)    |        |        |              |
|        | Sn4    | 2.6288(4)    |        |        |              |
|        | Sn5    | 2.5954(5)    |        |        |              |

**Table S17.** Selected interatomic distances in **5**.

| Atom 1 | Atom 2 | distance [Å] | Atom 1 | Atom 2 | distance [Å] |
|--------|--------|--------------|--------|--------|--------------|
| Sn1    | Sn2    | 3.0578(10)   | Li1    | N1     | 2.051(17)    |
|        | Sn4    | 3.1034(10)   |        | N3     | 2.052(19)    |
| Sn2    | Sn3    | 3.0936(11)   |        | N5     | 2.074(17)    |
|        | Sn4    | 3.1179(11)   |        | N7     | 2.10(2)      |
|        | Sn5    | 3.1321(11)   | Li2    | N2     | 2.044(18)    |
| Sn3    | Sn5    | 3.0654(12)   |        | N4     | 2.093(18)    |
|        | Sn4    | 3.0756(12)   |        | N6     | 2.062(18)    |
| Sn3'   | Sn5    | 3.0952(10)   |        | N8     | 2.03(2)      |
| Sn4    | Sn5    | 3.1133(11)   |        |        |              |
| Pd     | Sn1    | 2.6880(15)   |        |        |              |
|        | Sn2    | 2.6460(9)    |        |        |              |
|        | Sn3    | 2.7191(9)    |        |        |              |
|        | Sn4    | 2.6747(8)    |        |        |              |
|        | Sn5    | 2.6398(11)   |        |        |              |

**Table S18.** Selected interatomic distances in **6** (left) and in **7** (right).

| Atom 1 | Atom 2 | distance [Å] | Atom 1 | Atom 2 | distance [Å] |
|--------|--------|--------------|--------|--------|--------------|
| Pb1    | Pb2    | 3.1091(7)    | Pb1    | Pb2    | 3.1088(10)   |
|        | Pb4    | 3.1551(7)    |        | Pb4    | 3.1637(11)   |
| Pb2    | Pb3    | 3.1520(7)    | Pb2    | Pb3    | 3.1528(10)   |
|        | Pb4    | 3.1825(8)    |        | Pb4    | 3.1801(13)   |
|        | Pb5    | 3.2285(8)    |        | Pb5    | 3.2339(10)   |
| Pb3    | Pb4    | 3.1377(9)    | Pb3    | Pb4    | 3.1335(12)   |
|        | Pb5    | 3.1237(8)    |        | Pb5    | 3.1190(12)   |
|        | Pb5'   | 3.1416(7)    |        | Pb5'   | 3.1459(11)   |
| Pb4    | Pb5    | 3.2169(8)    | Pb4    | Pb5    | 3.2177(12)   |
| Pd     | Pb1    | 2.741(2)     | Pt     | Pb1    | 2.751(2)     |
|        | Pb2    | 2.6837(10)   |        | Pb2    | 2.6796(10)   |
|        | Pb3    | 2.8172(12)   |        | Pb3    | 2.8156(12)   |
|        | Pb4    | 2.7138(10)   |        | Pb4    | 2.7153(11)   |
|        | Pb5    | 2.6594(17)   |        | Pb5    | 2.6609(16)   |
| Li1    | N1     | 2.08(2)      | Li1    | N1     | 2.07(3)      |
|        | N3     | 2.04(2)      |        | N3     | 2.12(3)      |
|        | N5     | 2.10(2)      |        | N5     | 2.08(3)      |
|        | N7     | 2.09(2)      |        | N7     | 2.03(3)      |
| Li2    | N2     | 2.04(2)      | Li2    | N2     | 2.06(3)      |
|        | N4     | 2.07(2)      |        | N4     | 2.06(3)      |
|        | N6     | 2.06(2)      |        | N6     | 2.08(3)      |
|        | N8     | 2.09(2)      |        | N8     | 2.05(3)      |

## 7. Cartesian coordinates of optimized structures

**Table S19.** Cartesian coordinates of the optimised structure of  $[\text{Co}@\text{Sn}_9]^{4-}$ .

| Atom | x                 | y                 | z                 |
|------|-------------------|-------------------|-------------------|
| Co   | 14.12596979767554 | 14.57316142632465 | 14.06202586672079 |
| Sn   | 15.12184442388168 | 12.55808908545825 | 12.71263390078635 |
| Sn   | 12.22796155323993 | 13.33816529266712 | 12.84135982873356 |
| Sn   | 14.70636116114863 | 15.47439464137410 | 16.45431056974489 |
| Sn   | 14.08614280874879 | 17.14208796212468 | 14.03929614868967 |
| Sn   | 16.54241358442958 | 15.48288770335133 | 13.61166846241965 |
| Sn   | 13.30460604726878 | 12.56207664423453 | 15.53227028518493 |
| Sn   | 16.18743595299994 | 13.15816411581721 | 15.39156078256227 |
| Sn   | 14.34483285447173 | 15.23207819102040 | 11.59128645911300 |
| Sn   | 11.96243181613515 | 15.23468493762748 | 15.28108769604462 |

**Table S20.** Cartesian coordinates of the optimised structure of  $[\text{Fe}@\text{Sn}_9]^{4-}$ .

| Atom | x                 | y                 | z                 |
|------|-------------------|-------------------|-------------------|
| Fe   | 14.20505679608567 | 14.52247044879041 | 14.11225086424997 |
| Sn   | 15.14644434832207 | 12.51160710679029 | 12.68347432905173 |
| Sn   | 12.16305814285005 | 13.37138448640103 | 12.79877394948313 |
| Sn   | 14.72006014928080 | 15.48889960525713 | 16.51198444600973 |
| Sn   | 14.02390744389945 | 17.19155916648451 | 13.99831680572657 |
| Sn   | 16.60056925510808 | 15.49662607431882 | 13.60184905676362 |
| Sn   | 13.28890641150833 | 12.51662758158586 | 15.56739999947981 |
| Sn   | 16.28629292322376 | 13.09300248093373 | 15.45528589236898 |
| Sn   | 14.28180541213031 | 15.28124645157562 | 11.54369160307026 |
| Sn   | 11.89389911759116 | 15.28236659786230 | 15.24447305379586 |

## 7. References

- [1] V. Queneau, S. C. Sevov, *Inorg. Chem.* 1998, **37**, 1358-1360.
- [2] C. Hoch, Wendorff, M. & Röhr, C., *Acta Cryst.* 2002, **C59**, i45-i46.
- [3] G. Sheldrick, *Acta Crystallogr. Sect. A* 2008, **64**, 112-122.
- [4] G. Sheldrick, *Acta Crystallogr. Sect. C* 2015, **71**, 3-8.
- [5] S. Stoll, A. Schweiger, *J. Magn. Reson.* 2006, **178**, 42-55.
- [6] L. Link, R. Niewa, *J. Appl. Crystallogr.* 2023, **56**.
- [7] F. Neese, F. Wennmohs, U. Becker, C. Riplinger, *J. Phys. Chem.* 2020, **152**.
- [8] F. Neese, *Wiley Interdiscip. Rev. Comput. Mol. Sci.* 2018, **8**, e1327.
- [9] R. A. Kendall, H. A. Früchtl, *Theor. Chem. Acc.* 1997, **97**, 158-163.
- [10] F. Neese, F. Wennmohs, A. Hansen, U. Becker, *Chem. Phys.* 2009, **356**, 98-109.
- [11] S. Grimme, *J. Phys. Chem.* 2005, **109**, 3067-3077.
- [12] N. B. Balabanov, K. A. Peterson, *J. Phys. Chem.* 2006, **125**.
- [13] J. G. Hill, K. A. Peterson, *J. Phys. Chem.* 2014, **141**.
- [14] StoeWinXPow, STOE, Germany, Darmstadt, **2003**.
- [15] S. Scharfe, T. F. Fässler, S. Stegmaier, S. D. Hoffmann, K. Ruhland, *Chem. Eur. J.* 2008, **14**, 4479-4483.
- [16] V. Hlukhyy, H. He, L.-A. Jantke, T. F. Fässler, *Chem. Eur. J.* 2012, **18**, 12000-12007.
- [17] V. Hlukhyy, S. Stegmaier, L. van Wüllen, T. F. Fässler, *Chem. Eur. J.* 2014, **20**, 12157-12164.
- [18] C. Liu, L.-J. Li, X. Jin, J. E. McGrady, Z.-M. Sun, *Inorg. Chem.* 2018, **57**, 3025-3034.
- [19] B. J. L. Witzel, W. Klein, J. V. Dums, M. Boyko, T. F. Fässler, *Angew. Chem. Int. Ed.* 2019, **58**, 12908-12913.
- [20] M. M. Gillett-Kunnath, J. I. Paik, S. M. Jensen, J. D. Taylor, S. C. Sevov, *Inorg. Chem.* 2011, **50**, 11695-11701.
- [21] Y.-N. Yang, L. Qiao, Z.-M. Sun, *Chin. Chem. Lett.* 2023, **34**, 107207.
